# Supplementary material
Source: PubMed Central journal article supplement (PMC9069342)
Supplement: jamapsychiatry-e220914-s001.pdf [file jamapsychiatry-e220914-s001.pdf]

## Supplementary Online Content

Tylee DS, Lee YK, Wendt FR, et al. An atlas of genetic correlations and genetically informed associations linking psychiatric and immune-related phenotypes. *JAMA Psychiatry*. Published online May 4, 2022. doi:10.1001/jamapsychiatry.2022.0914

### **eMethods.**

### **eDiscussion.**

### **eReferences.**

**eFigure 1.** Flow Chart of the Study Design and Analysis Plan

**eFigure 2.** Genetic Correlations Among Psychiatric Disorders and Immune-Related Traits and Other Risk Factors

**eFigure 3.** MVMR Effects After Adjustment for Other Risk Factors

**eFigure 4.** Miami Plots Depicting Concordant and Discordant Effects Identified via 2-Sided Meta-Analysis of Psychiatric-Immune Phenotype Pairs

**eFigure 5.** Tissue and Cell Type Enrichment Analyses of Loci With Concordant and Discordant Effects Within the Psychiatric-Immune Associations Identified

This supplementary material has been provided by the authors to give readers additional information about their work.

## eMethods

### Data Selection

In order to find genome-wide association (GWA) summary statistics, we searched the published literature (Pubmed, SCOPUS), data repositories (dbGaP, GWAS ATLAS [<https://atlas.ctglab.nl>], GWAS catalogue [<https://www.ebi.ac.uk/gwas>], opentargets.org), and the Psychiatric Genomics Consortium (PGC) website (<https://www.med.unc.edu/pgc/>). We sought data from studies with the largest available European ancestry, due to the limited availability of well-powered GWA data from other ancestry groups.<sup>1</sup> Most of the selected summary data were produced *via* meta-analyses of large case-control samples by multi-institutional collaborative consortia; detailed descriptions of selection criteria, quality control, and analyses are described within the individual studies (see references in Table 1 and S. Table 1). We included 14 psychiatric phenotypes, including attention deficit hyperactivity disorder (ADHD;  $N = 53,293$ )<sup>2</sup>, anorexia nervosa (AN;  $N = 72,517$ )<sup>3</sup>, bipolar disorder ( $N = 51,710$ )<sup>4</sup>, the PGC cross-disorder phenotype (PGC-CD;  $N = 107,785$ )<sup>5</sup>, cannabis use disorder (CUD;  $N = 357,806$ )<sup>6</sup>, major depressive disorder (MDD;  $N = 500,199$ )<sup>7</sup>, obsessive-compulsive disorder (OCD;  $N = 9,725$ )<sup>8</sup>, opioid use disorder (OUD;  $N = 82,707$ )<sup>9</sup>, problematic alcohol use (PAU;  $N = 435,563$ )<sup>10</sup>, post-traumatic stress disorder (PTSD;  $N = 174,659$ )<sup>11</sup>, schizophrenia (SZ;  $N = 105,318$ )<sup>12</sup>, and Tourette's syndrome (TS;  $N = 14,307$ ).<sup>13</sup> We also included three continuous phenotypes: generalized anxiety disorder ( $N = 175,163$ )<sup>14</sup> was assessed based on the GAD-2 Score,<sup>15</sup> a 2-item self-report assessment of the frequency of worrying and related physical sensations;<sup>15</sup> the personality trait of neuroticism ( $N = 168,105$ );<sup>16</sup> and another dispositional trait reflecting risk tolerance (RT;  $N = 315,894$ ).<sup>17</sup> We selected 13 immune-related phenotypes, including allergic rhinitis (AR;  $N = 289,307$ ),<sup>18</sup> asthma ( $N = 385,822$ ),<sup>18</sup> atopic dermatitis (AD;  $N = 40,835$ ),<sup>19</sup> celiac disease ( $N = 15,283$ ),<sup>20</sup> Crohn's disease ( $N = 40,266$ ),<sup>21</sup> hypothyroidism (HYPO;  $N = 244,890$ ; primarily autoimmune-mediated in developed countries),<sup>18</sup> primary biliary cholangitis (PBC;  $N = 13,239$ ),<sup>22</sup> primary sclerosing cholangitis (PSC;  $N = 14,890$ ),<sup>23</sup> rheumatoid arthritis (RA;  $N = 58,284$ ),<sup>24</sup> systemic lupus erythematosus (SLE;  $N = 23,210$ ),<sup>25</sup> type 1 diabetes (T1D;  $N = 26,890$ ),<sup>26</sup> ulcerative

colitis (UC;  $N = 45,975$ ),<sup>21</sup> and vitiligo ( $N = 44,266$ ).<sup>27</sup> Data for multiple sclerosis could not be shared at the time of our search.

We searched the literature using the following SCOPUS for articles identifying risk factors for psychiatric, allergic, autoimmune, and inflammatory disorders. We identified numerous risk factors that influence liability to both psychiatric and immune-related disorders, including age,<sup>28,29</sup> sex,<sup>30,31</sup> alcohol and tobacco consumption,<sup>32–37</sup> cognitive processing,<sup>38</sup> diet,<sup>39–42</sup> exercise,<sup>43,44</sup> early life stress or trauma,<sup>45–48</sup>, educational attainment,<sup>49</sup> infection and microbial dysbiosis,<sup>50–53</sup> perinatal factors,<sup>54–59</sup> obesity,<sup>60,61</sup> sleep,<sup>62,63</sup> socioeconomic status and neighborhood deprivation,<sup>64–67</sup> social connectedness,<sup>68</sup> and toxic exposures.<sup>69,70</sup> Additionally, our review identified considerable evidence that chronic stress leads to dysregulation of autonomic and neuroendocrine signaling mechanisms, which can have direct effects on liability to psychiatric and immune-related disorders, but are additionally proposed to exert effects through changes in function of certain immune cell populations, chronic low-grade inflammation, gastrointestinal dysbiosis, and changes in gastrointestinal and vascular permeability.<sup>71–75</sup> As such, we sought to include phenotypes that capture aspects of the human stress response. We included resting heart rate,<sup>18</sup> heart rate reactivity and recovery during exercise,<sup>76</sup> and heart rate variability,<sup>76</sup> all of which are influenced by cardiac autonomic signaling. We sought well-powered GWA data relevant to these phenotypes and ultimately selected 15 phenotypes, including body mass index (BMI;  $N = 806,834$ )<sup>77</sup>, cigarettes per day (CPD;  $N = 263,954$ )<sup>78</sup>, cognitive processing (CP;  $N = 257,828$ )<sup>79</sup>, alcoholic drinks per week (DPW;  $N = 537,349$ )<sup>78</sup>, educational attainment (EA;  $N = 766,345$ )<sup>79</sup>, the frequency of moderate-intensity exercise (EXER;  $N = 367,908$ )<sup>18</sup>, annual income ( $N = 332,594$ )<sup>18</sup>, sleep duration ( $N = 446,118$ )<sup>80</sup>, social deprivation (*via* the Townsend Index;<sup>81</sup> SOCD;  $N = 420,035$ ),<sup>82</sup> and the frequency of social interactions (SOI;  $N = 383,941$ ).<sup>18</sup> We also selected phenotypes that capture aspects of the human autonomic response to stress, including resting heart rate (HR;  $N = 361,411$ ),<sup>18</sup> HR increase during and recovery after exercise (HRI and HRR;  $N = 58,818$ ),<sup>83</sup> heart rate variability (HRV;  $N = 28,122$ ).<sup>83</sup> We sought to include cortisol-related phenotypes,<sup>84,85</sup> but this was precluded by low heritability ( $h^2$ ) Z-statistics and relatively small sample size. In order to restrict the scope of the study and preserve statistical power, we made the somewhat arbitrary decision to exclude a number of well-powered GWA studies capturing a variety of dietary consumption phenotypes,<sup>86,87</sup> and we also did not examine studies of gut microbiome composition and related metabolites.<sup>88,89</sup> The final list of phenotypes is provided in S. Table 1.

## Genetic Correlations via LD-Score Regression

We removed SNPs with MAF < 1% based on the 1000 Genomes Phase reference panel for European populations and we excluded the major histocompatibility region. We used *LD-score regression* (LDSC)<sup>90</sup> with default settings and the HapMap3 reference panel to estimate SNP  $h^2$ .

## Mendelian Randomization

We briefly review the assumptions and limitations of MR: 1) The instrument SNPs are associated and have a causal effect on the exposure phenotype. For exposures with sparse genetic architecture, weak associations between instrument SNP and exposure are likely to bias toward null findings. For polygenic phenotypes, the inclusion of a larger set of lower confidence instrument SNPs could increase the likelihood of selecting instrument SNPs that have a pleiotropic mechanism relevant to both the exposure and outcome phenotype. One approach to cope with potential bias introduced by weak instruments and highly polygenic phenotypes is to perform MR with robust associated profile scores.<sup>91</sup> 2) The exposure phenotype should share no common cause with the outcome phenotype (*i.e.*, there are no confounding factors). When this possibility is not excluded, multivariable MR can be used to reassess exposure-outcome relationships while adjusting for genetic associations of a third variable. 3) The instrument SNPs only exert effects on the outcome phenotype through the exposure phenotype, as opposed to shared biological mechanisms or mediation through some other phenotype. Outlier removal, heterogeneity testing, sensitivity analyses, and comparison across multiple MR methods can help evaluate this assumption. 4) Two-sample MR rests on the assumption of independent samples drawn from the same population and sample overlap can bias toward rejecting the null hypothesis, especially when there are weak instruments with overestimated effect sizes.

For the present study, the *TwoSampleMR* (TSMR)<sup>92</sup> package was used to harmonize data and threshold and clump instrument SNPs ( $p_1 < 5 \times 10^{-8}$ ,  $p_2 < 0.001$ , window =  $1 \times 10^5$ ). For phenotypes denoted with † in Table 1, this identified < 15 LD-independent SNPs, so we instead used a suggestive threshold of  $p < 1 \times 10^{-5}$ . Bidirectional MR analyses were performed using inverse variance-weighted (IVW) method with significance set at FDR  $q < 0.05$  and we verified findings with Egger-based models (reported in S. Tables). We performed single-SNP, heterogeneity, and leave-one-out (LOO) sensitivity analyses. We verified effects with the *mr.raps* package,<sup>91</sup> which uses adjusted profile scores that are more robust to outliers in the genetic instrument and

estimates effects under assumptions of pervasive balanced pleiotropy, which can account for weak instrument bias. We preferentially report results after removal of potential outlier SNPs ( $|\text{standardized residual}| > 2.5 \text{ s.d.}$  of the mean). We assessed the effects of adjustment for each of the third variables separately using the *MVMR* package with default settings.<sup>93</sup> To check for possible sample overlap among the MR effects, we examined LDSC covariance intercepts. For those with significant positive values, we repeated bidirectional IVW analyses using the *MRIap* package (default settings) to adjust for additional bias introduced by sample overlap.<sup>94</sup>

## Characterization of Loci

For six phenotype pairs with robust MR effects (*i.e.*,  $\text{FDR } q < 0.05$  and consistent across sensitivity and MVMR-adjusted analyses), a two-sided meta-analysis was performed using the *ASSETT* package.<sup>95</sup> Because we encountered an unresolvable error when combining continuous and dichotomous phenotypes, the effect of RT on AR was not assessed. SNPs showing significant effects for only one of the phenotypes were removed from the analysis. Subsets of SNPs with concordant and discordant effects were separately advanced for enrichment analysis using FUMA's SNP2GENE function. The concordant subsets included information about the direction of the effects, while the latter subsets contained only the overall model  $p$ -values. FUMA analysis was performed with clumping setting of  $r^2 < 0.1$ ,  $p$ -value thresholds corresponding to the threshold used to define the MR instrument (*i.e.*,  $5 \times 10^{-8}$  and in some cases  $1 \times 10^{-5}$ ) and the second threshold of 0.05, with the window size of 250kB, using the default settings for both positional and eQTL-based gene mapping. For cell-type analysis, we included available human single-cell RNA-seq reference datasets.<sup>96–105</sup> For cell types surviving multiple test correction (family-wise  $\text{FDR } q < 0.05$ ), we examined the pair-wise conditional analyses within- (*i.e.* Step 2) and across-reference datasets (*i.e.* Step 3) to prioritize among potentially correlated cell types. High proportional significance (PS; *i.e.*,  $\geq 0.8$ ) indicates complete independence, while lower values suggest partial or complete dependence on other correlated cell types. In S. Figure 5B, the numeral 2 denotes a cell type with  $\geq 0.8$  in Step 2, while 2' denotes the cell type with the highest PS despite being  $< 0.8$ . A similar relationship applies between numerals 3 and 3' with respect to Step 3 conditioning PS.

## eDiscussion

The main findings of our study supported modest positive effects of psychiatric on immune liability, where the relevant loci were primarily enriched with brain tissues and cell types, but also contained signals for

peripheral leukocytes and lymphoid tissue. These loci were also enriched in signal for various behavioral traits, immune cell counts, and biological terms including cell adhesion, calcium-binding, and response to viral infection. Below, we provide a literature search of individual genes implicating these biological terms. When we considered the six robust positive MR effects (*i.e.*, FDR  $q < 0.05$  and consistent across sensitivity and MVMR-adjusted analyses), 54 psychiatric instrument loci were independent of third variable effects. These were significantly enriched (FDR  $q < 0.05$ ) for several annotations, including cellular adhesion (comprised of genes *ATXN1*, *ADD3*, and the protocadherin- $\alpha$  family within a locus in 5q31.3; S. Table 5).

For *ATXN1*, the relevant protein participates in complex interactions to regulate transcription and splicing, though its exact roles are not well understood. Our review identified considerable mechanistic evidence linking polyglutamine expansion mutations in this gene (and others) with various neurodegenerative disorders, including spinocerebellar ataxias and amyotrophic lateralsclerosis,<sup>106–108</sup> but its less clear how it may relate to the penetrance of autosomal dominant Alzheimer's phenotypes.<sup>109</sup> This gene was identified in bioinformatic analyses based on enriched protein-protein interactions with 19 candidate genes for SZ.<sup>110</sup> Additionally, *ATXN1* appears to have relevance to immune-related diseases, as loss of function is associated with more severe disease in a mouse model of multiple sclerosis, and this was mediated by effects on a potentially pathogenic B-cell subpopulation.<sup>111,112</sup> It plays a role in extracellular matrix remodeling during lung development and is down-regulated in a model of asthma.<sup>113,114</sup> Additionally, it was identified in prior pharmacogenetic GWAS of IBD treatment response.<sup>115</sup> GWAS studies support associations of *ATXN1* with cognitive function, intelligence, and educational attainment.<sup>116,117</sup>

*ADD3* encodes  $\gamma$ -adducins, which are ubiquitously expressed, heteromeric proteins that participate in membrane-associated spectrin-actin cytoskeletal networks and interact with calmodulin.<sup>118</sup> Homozygous loss-of-function mutations within a consanguineous family were associated with inherited cerebral palsy.<sup>112</sup> Loss-of-function mutations have also been associated with renal podocyte dysfunction and related chronic kidney disease.<sup>119</sup> GWAS data suggest this gene may be relatively specific to bipolar disorder<sup>120</sup> and it was identified in an earlier study comparing bipolar I and II.<sup>121</sup> There is literature linking  $\gamma$ -adducins to electrophysiological plasticity induced by environmental stimuli (*e.g.*, effects of cocaine exposure on striatal neurons) and learning behavior (*e.g.*, Morris water maze).<sup>122,123</sup> Another line of research associated gamma-adducin expression with blood pressure homeostasis and with cerebrovascular and blood-brain-barrier dysfunction.<sup>119,124</sup> A GWAS

study in East Asian ancestry identified *ADD3* in association with neonatal biliary atresia.<sup>125</sup> *ADD3* was identified among differentially expressed genes that discriminated intestinal biopsies from Celiac-affected individuals and subsets of first degree relatives that lacked serological evidence of disease activity.<sup>126</sup> Furthermore, *ADD3* was down-regulated in a mouse model of spontaneous colitis caused by macrophage-restricted knockout of the *IL10RA* gene.<sup>127</sup> *ADD3* was also identified among CD4+ T cell genes whose expression discriminated high- and low-atopy subtypes of asthma and predicted differences in eosinophil counts and IgE levels.<sup>128</sup>

Protocadherins are cell adhesion molecules that undergo alternative splicing and combinatorial heteromerization to allow specificity of cell recognition, though their exact roles in the developing and adult CNS are not well understood yet.<sup>129–131</sup> Multiple subtypes of protocadherins have been identified, and members of the clustered  $\alpha$ -protocadherin family have been associated with psychiatric and neurodevelopmental phenotypes.<sup>130</sup> Deletion of this family was associated with reduced post-injury axon outgrowth, myelination, and expression of *BDNF* in rodent model.<sup>132</sup> Deletion of this family also impacted cortical neuron migration<sup>133</sup> and serotonergic fiber development and maturation.<sup>134,135</sup> One study found  $\alpha$ -protocadherins were upregulated during stimulation of Th<sub>2</sub> lymphocytes.<sup>136</sup> We also found relevant associations with other types of protocadherins. *PCDH1* plays a well-characterized role in asthma pathophysiology and is important in the response to glucocorticoids.<sup>137,138</sup> Roles in GI epithelial structure and function have been observed for members of the other protocadherin families.<sup>139</sup>

We also saw enrichment for genes involved in calcium-binding (including *LTBP2*, *PLCB2*, and *MATN4*). *LTBP2* encodes a latent transforming growth factor (TGF) beta binding protein, which is found in association with fibrillin in the extracellular matrix and thought to help limit the availability of TGF- $\beta$ .<sup>140</sup> TGF- $\beta$  plays a role in regulating inflammation and promoting airway and extracellular matrix remodeling in asthma.<sup>145</sup> Both TGF- $\beta$  and *LTBP2* genes play roles in inflammation-induced fibrosis in other organs, including the intestines.<sup>146,147</sup> Mutations of *LTBP2* are associated with congenital ophthalmic disorders,<sup>141,142</sup> but there is less evidence linking it with psychiatric phenotypes. Research in pulmonary development identifies roles for several members of the LTBP gene family.<sup>143</sup> Secreted protein product of *LTBP2* was identified as a biomarker of idiopathic pulmonary fibrosis.<sup>144</sup> Interestingly, *LTBP2* was identified among genes differentially expressed after antibiotic treatment designed to alter the gut microbiome.<sup>148</sup> Research in oncology identifies a role for *LTBP2* in tumor/metastasis suppression for several malignancies.<sup>149,150</sup> *PLCB2* encodes phospholipase C beta-2, an enzyme that

participates in G-protein-coupled signaling pathways relevant to taste receptors and regulation of platelet response.<sup>151,152</sup> This gene was identified in secondary analyses of SZ GWAS data.<sup>153</sup> It was also found among down-regulated genes in the amygdala of rats subjected to chronic stress.<sup>154</sup> This gene also participates in pathways that influence differentiation, activation, and chemotaxis of multiple immune cells.<sup>155,156</sup> One study identified a role in negative regulation of inflammatory signaling in a model of viral infection.<sup>157</sup> It was also among over-expressed genes in childhood asthma.<sup>158</sup> *MATN4* encodes matrilin-4, a member of the von Willebrand factor A domain-containing protein family, which are involved in formation of filamentous extracellular matrix-associated in various tissues. Mutations in this gene have been found in neurogenetic syndromes within consanguineous families.<sup>159</sup> The gene was also identified among those differentially methylated in children in relation to history of early life adversity and adults in relation to air pollution.<sup>160,161</sup> Matrilin-4 has been shown experimentally to regulate stress-induced hematopoietic stem cell proliferation.<sup>162</sup> *MATN4* was also identified among hundreds of differentially expressed genes identified in IBD.

We also observed enrichment among genes downregulated in a fibroblast model of human cytomegalovirus infection, including *AKT3*, *ADD3*, *CHMP2A*, *TMCO6*, *REV3L*, *TRAF3IP2*, and *TNKS*. *AKT3* encodes a serine/threonine kinase that regulates signaling in response to growth factors like platelet-derived growth factor and insulin-like growth factor 1. In humans, mutations in *AKT3* are associated with profound neurodevelopmental phenotypes<sup>163</sup> and experimental models also suggest roles in behavioral traits.<sup>164–167</sup> In T-regulatory cells, *AKT3* inhibits interferon- $\gamma$ , and loss of this function may promote loss of this cell population's suppressive function.<sup>168</sup> Loss of function is also associated with more severe phenotypes in models of multiple sclerosis.<sup>169,170</sup> *AKT3* was investigated as a potential susceptibility gene in an association analysis between Danish and Genetics of Asthma International Network families, but associations were non-significant.<sup>171</sup>

*CHMP2A* encodes a protein that functions within the endosomal sorting systems and within exosomes. Loss of function mutations are thought to contribute to proteostatic stress that causes neurodegenerative phenotypes.<sup>172</sup> *TMCO6* is a transmembrane protein whose function is not well characterized, but loss-of-function mutations are associated with a subtype of mitochondrial complex I deficiency. Within bipolar-affected and unaffected individuals, this gene was near a locus associated with soluble CD14 levels (a non-specific marker of monocyte activation) within cerebrospinal fluid samples.<sup>173</sup>



*REV3L* encodes a catalytic subunit of DNA polymerase zeta, which is found in the mitochondria and plays a role in the response to DNA damage. Numerous studies have examined its role in malignancies,<sup>174,175</sup> including cervical cancer,<sup>174</sup> chemoresistant squamous cell carcinoma of the head and neck,<sup>176,177</sup> and non-small cell lung cancer.<sup>178</sup> Defects in this gene are associated with genotoxic stress and interferon activation,<sup>179</sup> and are disruptive to mammalian embryonic development.<sup>180–182</sup> SNPs in intergenic regions including *REV3L* and *TRAF3IP2* were associated with rheumatoid arthritis in a large-scale study of black South Africans.<sup>183</sup>

*TRAF3IP2* encodes an adaptor protein that plays a central role in innate immunity response to pathogens, inflammation, and stress via regulating responses of the Rel/NF-kappaB transcription factor family members in their response to cytokines.<sup>184</sup> *TRAF3IP2* facilitates pro-inflammatory IL-17 signaling,<sup>185–187</sup> which has been implicated in endothelial dysfunction and cardiovascular disease,<sup>188–191</sup> as well as obesity-related vascular insulin resistance.<sup>192</sup> GWA studies have identified a locus in *TRAF3IP2* with common variants affecting susceptibility to psoriasis and psoriatic arthritis,<sup>194,195</sup> as well as an association with cutaneous manifestations of inflammatory bowel disease,<sup>196</sup> and susceptibility to mucocutaneous adverse reactions among patients treated with Nevirapine.<sup>197</sup> *TNKS* encodes a poly-ADP-ribosyltransferase involved in several processes, including activation of Wnt/beta-catenin signaling pathway,<sup>198,199</sup> as well as in regulating telomere length<sup>200</sup> and vesicle trafficking.<sup>201</sup> It's been studied for its role in malignancy,<sup>202,203</sup> herpesvirus infection,<sup>204,205</sup> and obesity.<sup>206</sup>

Among the 54 loci involved in six robust psychiatric-immune MR effects (described in main text and S. Table 4), we observed nominal enrichment (uncorrected  $p < 0.05$ ) for multiple immunologic signatures (e.g., genes down-regulated by IFN-gamma in microglia,  $p = 1.3 \times 10^{-4}$ , targets of several transcription factors (e.g., ELK1  $p = 1.5 \times 10^{-4}$ ; E2A  $p = 0.01$ ; STAT1  $p = 0.01$ ), and transcripts upregulated by suppression of JAK2 ( $p = 0.01$ ; S. Table 5). Overall, these findings support the idea that genes with pleiotropic effects potentially relevant to both psychiatric and immune-related disorders were identified in association with some of the loci contributing to significant MR effects.

## eReferences

1. G S, SM W, SA T. The Missing Diversity in Human Genetic Studies. *Cell*. 2019;177(1):26-31. doi:10.1016/J.CELL.2019.02.048
2. Demontis D, Walters RK, Martin J, et al. Discovery of the first genome-wide significant risk loci for

- attention deficit/hyperactivity disorder. *Nat Genet.* 2019;51(1):63-75. doi:10.1038/s41588-018-0269-7
3. Watson HJ, Yilmaz Z, Thornton LM, et al. Genome-wide association study identifies eight risk loci and implicates metabo-psychiatric origins for anorexia nervosa. *Nat Genet.* 2019;51(8):1207-1214. doi:10.1038/s41588-019-0439-2
  4. Stahl EA, Breen G, Forstner AJ, et al. Genome-wide association study identifies 30 loci associated with bipolar disorder. *Nat Genet.* 2019;51(5):793-803. doi:10.1038/s41588-019-0397-8
  5. Lee PH, Anttila V, Won H, et al. Genomic Relationships, Novel Loci, and Pleiotropic Mechanisms across Eight Psychiatric Disorders. *Cell.* 2019;179(7):1469-1482.e11. doi:10.1016/j.cell.2019.11.020
  6. Johnson EC, Demontis D, Thorgeirsson TE, et al. A large-scale genome-wide association study meta-analysis of cannabis use disorder. *Lancet Psychiatry.* 2020;7(12):1032-1045. doi:10.1016/s2215-0366(20)30339-4
  7. Howard DM, Adams MJ, Clarke TK, et al. Genome-wide meta-analysis of depression identifies 102 independent variants and highlights the importance of the prefrontal brain regions. *Nat Neurosci.* 2019;22(3):343-352. doi:10.1038/s41593-018-0326-7
  8. Arnold PD, Askland KD, Barlassina C, et al. Revealing the complex genetic architecture of obsessive-compulsive disorder using meta-analysis. *Mol Psychiatry.* Published online August 1, 2017. doi:10.1038/mp.2017.154
  9. Zhou H, Rentsch CT, Cheng Z, et al. Association of OPRM1 Functional Coding Variant With Opioid Use Disorder: A Genome-Wide Association Study. *JAMA Psychiatry.* 2020;77(10):1072-1080. doi:10.1001/jamapsychiatry.2020.1206
  10. Zhou H, Sealock JM, Sanchez-Roige S, et al. Genome-wide meta-analysis of problematic alcohol use in 435,563 individuals yields insights into biology and relationships with other traits. *Nat Neurosci.* 2020;23(7):809-818. doi:10.1038/s41593-020-0643-5
  11. Nievergelt CM, Maihofer AX, Klengel T, et al. International meta-analysis of PTSD genome-wide association studies identifies sex- and ancestry-specific genetic risk loci. *Nat Commun.* 2019;10(1):4558. doi:10.1038/s41467-019-12576-w
  12. Pardiñas AF, Holmans P, Pocklington AJ, et al. Common schizophrenia alleles are enriched in mutation-intolerant genes and in regions under strong background selection. *Nat Genet.* 2018;50(3):381-389.

doi:10.1038/s41588-018-0059-2

13. Yu D, Sul JH, Tsetsos F, et al. Interrogating the Genetic Determinants of Tourette's Syndrome and Other Tic Disorders Through Genome-Wide Association Studies. *Am J Psychiatry*. 2019;176(3):217-227. doi:10.1176/appi.ajp.2018.18070857
14. Levey DF, Gelernter J, Polimanti R, et al. Reproducible Genetic Risk Loci for Anxiety: Results From ~200,000 Participants in the Million Veteran Program. *Am J Psychiatry*. 2020;177(3):223-232. doi:10.1176/appi.ajp.2019.19030256
15. Kroenke K, Spitzer RL, Williams JBW, Löwe B. The Patient Health Questionnaire Somatic, Anxiety, and Depressive Symptom Scales: a systematic review. *Gen Hosp Psychiatry*. 2010;32(4):345-359. doi:10.1016/J.GENHOSPPSYCH.2010.03.006
16. Turley P, Walters RK, Maghzian O, et al. Multi-trait analysis of genome-wide association summary statistics using MTAG. *Nat Genet*. 2018;50(2):229-237. doi:10.1038/s41588-017-0009-4
17. Karlsson Linnér R, Biroli P, Kong E, et al. Genome-wide association analyses of risk tolerance and risky behaviors in over 1 million individuals identify hundreds of loci and shared genetic influences. *Nat Genet*. 2019;51(2):245-257. doi:10.1038/s41588-018-0309-3
18. Watanabe K, Stringer S, Frei O, et al. A global overview of pleiotropy and genetic architecture in complex traits. *Nat Genet*. 2019;51(9):1339-1348. doi:10.1038/s41588-019-0481-0
19. Paternoster L, Standl M, Waage J, et al. Multi-ancestry genome-wide association study of 21,000 cases and 95,000 controls identifies new risk loci for atopic dermatitis. *Nat Genet*. 2015;47(12):1449-1456. doi:10.1038/ng.3424
20. Dubois PCA, Trynka G, Franke L, et al. Multiple common variants for celiac disease influencing immune gene expression. *Nat Genet*. 2010;42(4):295-302. doi:10.1038/ng.543
21. de Lange KM, Moutsianas L, Lee JC, et al. Genome-wide association study implicates immune activation of multiple integrin genes in inflammatory bowel disease. *Nat Genet*. 2017;49(2):256-261. doi:10.1038/ng.3760
22. Cordell HJ, Han Y, Mells GF, et al. International genome-wide meta-analysis identifies new primary biliary cirrhosis risk loci and targetable pathogenic pathways. *Nat Commun*. 2015;6:8019. doi:10.1038/ncomms9019

23. Ji SG, Juran BD, Mucha S, et al. Genome-wide association study of primary sclerosing cholangitis identifies new risk loci and quantifies the genetic relationship with inflammatory bowel disease. *Nat Genet.* 2017;49(2):269-273. doi:10.1038/ng.3745
24. Okada Y, Wu D, Trynka G, et al. Genetics of rheumatoid arthritis contributes to biology and drug discovery. *Nature.* 2014;506(7488):376-381. doi:10.1038/nature12873
25. Bentham J, Morris DL, Cunninghame Graham DS, et al. Genetic association analyses implicate aberrant regulation of innate and adaptive immunity genes in the pathogenesis of systemic lupus erythematosus. *Nat Genet.* 2015;47(12):1457-1464. doi:10.1038/ng.3434
26. Bradfield JP, Qu HQ, Wang K, et al. A genome-wide meta-analysis of six type 1 diabetes cohorts identifies multiple associated loci. *PLoS Genet.* 2011;7(9). doi:10.1371/journal.pgen.1002293
27. Jin Y, Andersen G, Yorgov D, et al. Genome-wide association studies of autoimmune vitiligo identify 23 new risk loci and highlight key pathways and regulatory variants. *Nat Genet.* 2016;48(11):1418-1424. doi:10.1038/ng.3680
28. Solmi M, Radua J, Olivola M, et al. Age at onset of mental disorders worldwide: large-scale meta-analysis of 192 epidemiological studies. *Mol Psychiatry* 2021. 2021;17:1-15. doi:10.1038/s41380-021-01161-7
29. Amador-Patarroyo MJ, Rodriguez-Rodriguez A, Montoya-Ortiz G. How Does Age at Onset Influence the Outcome of Autoimmune Diseases? *Autoimmune Dis.* 2012;2012(1). doi:10.1155/2012/251730
30. Gleicher N, Barad DH. Gender as risk factor for autoimmune diseases. *J Autoimmun.* 2007;28(1):1-6. doi:10.1016/J.JAUT.2006.12.004
31. Riecher-Rössler A. Sex and gender differences in mental disorders. *The Lancet Psychiatry.* 2017;4(1):8-9. doi:10.1016/S2215-0366(16)30348-0
32. Mahid SS, Minor KS, Soto RE, Hornung CA, Galandiuk S. Smoking and Inflammatory Bowel Disease: A Meta-analysis. *Mayo Clin Proc.* 2006;81(11):1462-1471. doi:10.4065/81.11.1462
33. Saulyte J, Regueira C, Montes-Martínez A, Khudyakov P, Takkouche B. Active or passive exposure to tobacco smoking and allergic rhinitis, allergic dermatitis, and food allergy in adults and children: a systematic review and meta-analysis. *PLoS Med.* 2014;11(3). doi:10.1371/JOURNAL.PMED.1001611
34. Prochaska JJ, Das S, Young-Wolff KC. Smoking, Mental Illness, and Public Health. *Annu Rev Public*

35. Yuan S, Yao H, Larsson SC. Associations of cigarette smoking with psychiatric disorders: evidence from a two-sample Mendelian randomization study. *Sci Reports* 2020 101. 2020;10(1):1-9. doi:10.1038/s41598-020-70458-4
36. Jiang X, Zhu Z, Manouchehrinia A, Olsson T, Alfredsson L, Kockum I. Alcohol Consumption and Risk of Common Autoimmune Inflammatory Diseases—Evidence From a Large-Scale Genetic Analysis Totaling 1 Million Individuals. *Front Genet*. 2021;12. doi:10.3389/FGENE.2021.687745
37. Palzes VA, Parthasarathy S, Chi FW, et al. Associations Between Psychiatric Disorders and Alcohol Consumption Levels in an Adult Primary Care Population. *Alcohol Clin Exp Res*. 2020;44(12):2536. doi:10.1111/ACER.14477
38. McTeague LM, Goodkind MS, Etkin A. Transdiagnostic Impairment of Cognitive Control in Mental Illness. *J Psychiatr Res*. 2016;83:37. doi:10.1016/J.JPSYCHIRES.2016.08.001
39. Manzel A, Muller DN, Hafler DA, Erdman SE, Linker RA, Kleinewietfeld M. Role of “Western Diet” in Inflammatory Autoimmune Diseases. *Curr Allergy Asthma Rep*. 2014;14(1):404. doi:10.1007/S11882-013-0404-6
40. Li Y, Lv MR, Wei YJ, et al. Dietary patterns and depression risk: A meta-analysis. *Psychiatry Res*. 2017;253:373-382. doi:10.1016/J.PSYCHRES.2017.04.020
41. Firth J, Marx W, Dash S, et al. The Effects of Dietary Improvement on Symptoms of Depression and Anxiety: A Meta-Analysis of Randomized Controlled Trials. *Psychosom Med*. 2019;81(3):265. doi:10.1097/PSY.0000000000000673
42. Probst Y, Mowbray E, Svensen E, Thompson K. A Systematic Review of the Impact of Dietary Sodium on Autoimmunity and Inflammation Related to Multiple Sclerosis. *Adv Nutr*. 2019;10(5):902-910. doi:10.1093/ADVANCES/NMZ032
43. Sharif K, Watad A, Bragazzi NL, Lichtbroun M, Amital H, Shoenfeld Y. Physical activity and autoimmune diseases: Get moving and manage the disease. *Autoimmun Rev*. 2018;17(1):53-72. doi:10.1016/J.AUTREV.2017.11.010
44. Firth J, Solmi M, Wootton RE, et al. A meta-review of “lifestyle psychiatry”: the role of exercise, smoking, diet and sleep in the prevention and treatment of mental disorders. *World Psychiatry*. 2020;19(3):360-

45. LeMoult J, Humphreys KL, Tracy A, Hoffmeister JA, Ip E, Gotlib IH. Meta-analysis: Exposure to Early Life Stress and Risk for Depression in Childhood and Adolescence. *J Am Acad Child Adolesc Psychiatry*. 2020;59(7):842-855. doi:10.1016/J.JAAC.2019.10.011
46. Nelson CA, Scott RD, Bhutta ZA, Harris NB, Danese A, Samara M. Adversity in childhood is linked to mental and physical health throughout life. *BMJ*. 2020;371. doi:10.1136/BMJ.M3048
47. Copeland WE, Shanahan L, Hinesley J, et al. Association of Childhood Trauma Exposure With Adult Psychiatric Disorders and Functional Outcomes. *JAMA Netw Open*. 2018;1(7):e184493-e184493. doi:10.1001/JAMANETWORKOPEN.2018.4493
48. Dube SR, Fairweather D, Pearson WS, Felitti VJ, Anda RF, Croft JB. Cumulative childhood stress and autoimmune diseases in adults. *Psychosom Med*. 2009;71(2):243-250. doi:10.1097/PSY.0b013e3181907888
49. Erickson J, El-Gabalawy R, Palitsky D, et al. EDUCATIONAL ATTAINMENT AS A PROTECTIVE FACTOR FOR PSYCHIATRIC DISORDERS: FINDINGS FROM A NATIONALLY REPRESENTATIVE LONGITUDINAL STUDY. *Depress Anxiety*. 2016;33(11):1013-1022. doi:10.1002/DA.22515
50. Nikolova VL, Hall MRB, Hall LJ, Cleare AJ, Stone JM, Young AH. Perturbations in Gut Microbiota Composition in Psychiatric Disorders: A Review and Meta-analysis. *JAMA psychiatry*. 2021;78(12):1343-1354. doi:10.1001/JAMAPSYCHIATRY.2021.2573
51. Wucherpfennig KW. Mechanisms for the induction of autoimmunity by infectious agents. *J Clin Invest*. 2001;108(8):1097. doi:10.1172/JCI14235
52. Volkova A, Ruggles K V. Predictive Metagenomic Analysis of Autoimmune Disease Identifies Robust Autoimmunity and Disease Specific Microbial Signatures. *Front Microbiol*. 2021;12. doi:10.3389/FMICB.2021.621310/FULL
53. Khandaker GM, Zimbron J, Dalman C, Lewis G, Jones PB. Childhood infection and adult schizophrenia: A meta-analysis of population-based studies. *Schizophr Res*. 2012;139(1-3):161-168. doi:10.1016/J.SCHRES.2012.05.023
54. Froehlich-Santino W, Londono Tobon A, Cleveland S, et al. Prenatal and perinatal risk factors in a twin study of autism spectrum disorders. *J Psychiatr Res*. 2014;54(1):100-108.

doi:10.1016/j.jpsychires.2014.03.019

55. Davies C, Segre G, Estradé A, et al. Prenatal and perinatal risk and protective factors for psychosis: a systematic review and meta-analysis. *The Lancet Psychiatry*. 2020;7(5):399-410. doi:10.1016/S2215-0366(20)30057-2
56. Gardener H, Munger KL, Chitnis T, Michels KB, Spiegelman D, Ascherio A. Prenatal and perinatal factors and risk of multiple sclerosis. *Epidemiology*. 2009;20(4):611-618.  
doi:10.1097/EDE.0B013E31819ED4B9
57. Räisänen L, Viljakainen H, Sarkkola C, Kolho KL. Perinatal risk factors for pediatric onset type 1 diabetes, autoimmune thyroiditis, juvenile idiopathic arthritis, and inflammatory bowel diseases. *Eur J Pediatr*. 2021;180(7):2115-2123. doi:10.1007/S00431-021-03987-3
58. Metsälä J, Kilkkinen A, Kaila M, et al. Perinatal Factors and the Risk of Asthma in Childhood—A Population-based Register Study in Finland. *Am J Epidemiol*. 2008;168(2):170-178.  
doi:10.1093/AJE/KWN105
59. Kolevzon A, Gross R, Reichenberg A. Prenatal and perinatal risk factors for autism: a review and integration of findings. *Arch Pediatr Adolesc Med*. 2007;161(4):326-333. doi:10.1001/archpedi.161.4.326
60. Versini M, Jeandel PY, Rosenthal E, Shoenfeld Y. Obesity in autoimmune diseases: not a passive bystander. *Autoimmun Rev*. 2014;13(9):981-1000. doi:10.1016/J.AUTREV.2014.07.001
61. Simon GE, Von Korff M, Saunders K, et al. Association Between Obesity and Psychiatric Disorders in the US Adult Population. *Arch Gen Psychiatry*. 2006;63(7):824-830. doi:10.1001/ARCHPSYC.63.7.824
62. Li L, Wu C, Gan Y, Qu X, Lu Z. Insomnia and the risk of depression: A meta-analysis of prospective cohort studies. *BMC Psychiatry*. 2016;16(1):1-16. doi:10.1186/S12888-016-1075-3/FIGURES/4
63. Hsiao YH, Chen YT, Tseng CM, et al. Sleep Disorders and Increased Risk of Autoimmune Diseases in Individuals without Sleep Apnea. *Sleep*. 2015;38(4):581. doi:10.5665/SLEEP.4574
64. Calixto OJ, Anaya JM. Socioeconomic status. The relationship with health and autoimmune diseases. *Autoimmun Rev*. 2014;13(6):641-654. doi:10.1016/J.AUTREV.2013.12.002
65. Li X, Sundquist J, Hamano T, Sundquist K. Neighborhood Deprivation and Risks of Autoimmune Disorders: A National Cohort Study in Sweden. *Int J Environ Res Public Health*. 2019;16(20).  
doi:10.3390/IJERPH16203798

66. Fone D, White J, Farewell D, et al. Effect of neighbourhood deprivation and social cohesion on mental health inequality: a multilevel population-based longitudinal study. *Psychol Med*. 2014;44(11):2449-2460. doi:10.1017/S0033291713003255
67. McElroy E, McIntyre JC, Bentall RP, et al. Mental Health, Deprivation, and the Neighborhood Social Environment: A Network Analysis: <https://doi.org/10.1177/2167702619830640>. 2019;7(4):719-734. doi:10.1177/2167702619830640
68. Saeri AK, Cruwys T, Barlow FK, Stronge S, Sibley CG. Social connectedness improves public mental health: Investigating bidirectional relationships in the New Zealand attitudes and values survey. *Aust N Z J Psychiatry*. 2018;52(4):365-374. doi:10.1177/0004867417723990
69. Nilsen FM, Frank J, Tulve NS. A Systematic Review and Meta-Analysis Investigating the Relationship between Exposures to Chemical and Non-Chemical Stressors during Prenatal Development and Childhood Externalizing Behaviors. *Int J Environ Res Public Health*. 2020;17(7). doi:10.3390/IJERPH17072361
70. Khan A, Plana-Ripoll O, Antonsen S, et al. Environmental pollution is associated with increased risk of psychiatric disorders in the US and Denmark. *PLOS Biol*. 2019;17(8):e3000353. doi:10.1371/JOURNAL.PBIO.3000353
71. Liu YZ, Wang YX, Jiang CL. Inflammation: The Common Pathway of Stress-Related Diseases. *Front Hum Neurosci*. 2017;11. doi:10.3389/FNHUM.2017.00316
72. McEwen BS. Neurobiological and Systemic Effects of Chronic Stress. *Chronic Stress*. 2017;1. doi:10.1177/2470547017692328
73. Dhabhar FS. Effects of stress on immune function: the good, the bad, and the beautiful. *Immunol Res*. 2014;58(2-3):193-210. doi:10.1007/S12026-014-8517-0
74. Gong Y, Niu W, Tang Y, et al. Aggravated mucosal and immune damage in a mouse model of ulcerative colitis with stress. *Exp Ther Med*. 2019;17(3). doi:10.3892/ETM.2019.7162
75. Amano H, Negishi I, Akiyama H, Ishikawa O. Psychological Stress can Trigger Atopic Dermatitis in NC/Nga Mice: An Inhibitory Effect of Corticotropin-Releasing Factor. *Neuropsychopharmacol* 2008 333. 2007;33(3):566-573. doi:10.1038/sj.npp.1301435
76. Verweij N, van de Vegte YJ, van der Harst P. Genetic study links components of the autonomous



- nervous system to heart-rate profile during exercise. *Nat Commun*. 2018;9(1):898. doi:10.1038/s41467-018-03395-6
77. Pulit SL, Stoneman C, Morris AP, et al. Meta-analysis of genome-wide association studies for body fat distribution in 694 649 individuals of European ancestry. *Hum Mol Genet*. 2019;28(1):166-174. doi:10.1093/hmg/ddy327
78. Liu M, Jiang Y, Wedow R, et al. Association studies of up to 1.2 million individuals yield new insights into the genetic etiology of tobacco and alcohol use. *Nat Genet*. 2019;51(2):237-244. doi:10.1038/s41588-018-0307-5
79. Lee JJ, Wedow R, Okbay A, et al. Gene discovery and polygenic prediction from a genome-wide association study of educational attainment in 1.1 million individuals. *Nat Genet*. 2018;50(8):1112-1121. doi:10.1038/s41588-018-0147-3
80. Dashti HS, Jones SE, Wood AR, et al. Genome-wide association study identifies genetic loci for self-reported habitual sleep duration supported by accelerometer-derived estimates. *Nat Commun*. 2019;10(1):1100. doi:10.1038/s41467-019-08917-4
81. Townsend P. Deprivation. *J Soc Policy*. Published online 1987:125-146.
82. Pan-UKB\_Team. Pan-UKB. Published online 2020. <https://pan.ukbb.broadinstitute.org>
83. Nolte IM, Munoz ML, Tragante V, et al. Genetic loci associated with heart rate variability and their effects on cardiac disease risk. *Nat Commun*. 2017;8:15805. doi:10.1038/ncomms15805
84. Bolton JL, Hayward C, Direk N, et al. Genome wide association identifies common variants at the SERPINA6/SERPINA1 locus influencing plasma cortisol and corticosteroid binding globulin. *PLoS Genet*. 2014;10(7):e1004474. doi:10.1371/journal.pgen.1004474
85. Neumann A, Direk N, Crawford AA, et al. The low single nucleotide polymorphism heritability of plasma and saliva cortisol levels. *Psychoneuroendocrinology*. 2017;85:88-95. doi:10.1016/j.psyneuen.2017.08.011
86. Meddens SFW, de Vlaming R, Bowers P, et al. Genomic analysis of diet composition finds novel loci and associations with health and lifestyle. *Mol Psychiatry* 2020 266. 2020;26(6):2056-2069. doi:10.1038/s41380-020-0697-5
87. Kho M, Smith JA, Verweij N, et al. Genome-Wide Association Meta-Analysis of Individuals of European

- Ancestry Identifies Suggestive Loci for Sodium Intake, Potassium Intake, and Their Ratio Measured from 24-Hour or Half-Day Urine Samples. *J Nutr.* 2020;150(10):2635-2645. doi:10.1093/JN/NXAA241
88. Awany D, Allali I, Dalvie S, et al. Host and microbiome genome-wide association studies: Current state and challenges. *Front Genet.* 2019;10(JAN):637. doi:10.3389/FGENE.2018.00637/BIBTEX
89. Kurilshikov A, Medina-Gomez C, Bacigalupe R, et al. Large-scale association analyses identify host factors influencing human gut microbiome composition. *Nat Genet* 2021 532. 2021;53(2):156-165. doi:10.1038/s41588-020-00763-1
90. Bulik-Sullivan BK, Loh P-R, Finucane HK, et al. LD Score regression distinguishes confounding from polygenicity in genome-wide association studies. *Nat Genet.* 2015;47(3):291-295. doi:10.1038/ng.3211
91. Zhao Q, Wang J, Hemani G, Bowden J, Small DS. Statistical inference in two-sample summary-data Mendelian randomization using robust adjusted profile score. *Ann Stat.* 2020;48(3):1742-1769. doi:10.1214/19-AOS1866
92. G H, K T, G DS. Orienting the causal relationship between imprecisely measured traits using GWAS summary data. *PLoS Genet.* 2017;13(11). doi:10.1371/JOURNAL.PGEN.1007081
93. Sanderson E, Spiller W, Bowden J. Testing and correcting for weak and pleiotropic instruments in two-sample multivariable Mendelian randomization. *Stat Med.* Published online 2021. doi:10.1002/SIM.9133
94. Mounier N, Kutalik Z. Bias correction for inverse variance weighting Mendelian randomization. *bioRxiv.* Published online December 18, 2021:2021.03.26.437168. doi:10.1101/2021.03.26.437168
95. S B, P R, KB J, et al. A subset-based approach improves power and interpretation for the combined analysis of genetic association studies of heterogeneous traits. *Am J Hum Genet.* 2012;90(5):821-835. doi:10.1016/J.AJHG.2012.03.015
96. Breton G, Zheng S, Valieris R, Tojal da Silva I, Satija R, Nussenzweig MC. Human dendritic cells (DCs) are derived from distinct circulating precursors that are precommitted to become CD1c+ or CD141+ DCs. *J Exp Med.* 2016;213(13):2861-2870. doi:10.1084/JEM.20161135
97. M B, A V, SL W, et al. A Single-Cell Transcriptomic Map of the Human and Mouse Pancreas Reveals Inter- and Intra-cell Population Structure. *Cell Syst.* 2016;3(4):346-360.e4. doi:10.1016/J.CELS.2016.08.011
98. S D, SA S, Y Z, et al. A survey of human brain transcriptome diversity at the single cell level. *Proc Natl*

99. S Z, S Z, X F, et al. A single-cell RNA-seq survey of the developmental landscape of the human prefrontal cortex. *Nature*. 2018;555(7697):524-528. doi:10.1038/NATURE25980
100. G LM, D G, S C, et al. Molecular Diversity of Midbrain Development in Mouse, Human, and Stem Cells. *Cell*. 2016;167(2):566-580.e19. doi:10.1016/J.CELL.2016.09.027
101. H H, P L, R H, et al. STRT-seq-2i: dual-index 5' single cell and nucleus RNA-seq on an addressable microwell array. *Sci Rep*. 2017;7(1). doi:10.1038/S41598-017-16546-4
102. D W, S L, J W, et al. Comprehensive functional genomic resource and integrative model for the human brain. *Science*. 2018;362(6420). doi:10.1126/SCIENCE.AAT8464
103. GX Z, JM T, P B, et al. Massively parallel digital transcriptional profiling of single cells. *Nat Commun*. 2017;8. doi:10.1038/NCOMMS14049
104. N H, I A-D, A B, et al. Massively parallel single-nucleus RNA-seq with DroNc-seq. *Nat Methods*. 2017;14(10):955-958. doi:10.1038/NMETH.4407
105. M E, HE A, M M, et al. Single-Cell Analysis of Human Pancreas Reveals Transcriptional Signatures of Aging and Somatic Mutation Patterns. *Cell*. 2017;171(2):321-330.e14. doi:10.1016/J.CELL.2017.09.004
106. Skipper M. A two-pronged model of polyglutamine disease. *Nat Rev Genet* 2008 95. 2008;9(5):322-322. doi:10.1038/nrg2366
107. Tazelaar GHP, Boeynaems S, De Decker M, et al. ATXN1 repeat expansions confer risk for amyotrophic lateral sclerosis and contribute to TDP-43 mislocalization. *Brain Commun*. 2020;2(2):14. doi:10.1093/BRAINCOMMS/FCAA064
108. Crespo-Barreto J, Fryer JD, Shaw CA, Orr HT, Zoghbi HY. Partial Loss of Ataxin-1 Function Contributes to Transcriptional Dysregulation in Spinocerebellar Ataxia Type 1 Pathogenesis. *PLOS Genet*. 2010;6(7):e1001021. doi:10.1371/JOURNAL.PGEN.1001021
109. Gardiner SL, Harder AVE, Campman YJM, et al. Repeat length variations in ATXN1 and AR modify disease expression in Alzheimer's disease. *Neurobiol Aging*. 2019;73:230.e9-230.e17. doi:10.1016/J.NEUROBIOLAGING.2018.09.007
110. Liu J, Su B. Integrated analysis supports ATXN1 as a schizophrenia risk gene. *Schizophr Res*. 2018;195:298-305. doi:10.1016/J.SCHRES.2017.10.010

111. Didonna A, Puig EC, Ma Q, et al. Ataxin-1 regulates B cell function and the severity of autoimmune experimental encephalomyelitis. *Proc Natl Acad Sci U S A*. 2020;117(38):23742-23750. doi:10.1073/PNAS.2003798117/-/DCSUPPLEMENTAL
112. Ma Q, Didonna A. The novel multiple sclerosis susceptibility gene ATXN1 regulates B cell receptor signaling in B-1a cells. *Mol Brain*. 2021;14(1):1-5. doi:10.1186/S13041-020-00715-0/FIGURES/1
113. Plank MW, Maltby S, Tay HL, et al. MicroRNA Expression Is Altered in an Ovalbumin-Induced Asthma Model and Targeting miR-155 with Antagomirs Reveals Cellular Specificity. *PLoS One*. 2015;10(12):e0144810. doi:10.1371/JOURNAL.PONE.0144810
114. Lee Y, Fryer JD, Kang H, et al. ATXN1 protein family and CIC regulate extracellular matrix remodeling and lung alveolarization. *Dev Cell*. 2011;21(4):746-757. doi:10.1016/J.DEVCEL.2011.08.017
115. Dubinsky MC, Mei L, Friedman M, et al. Genome Wide Association (GWA) Predictors Of Anti-TNF $\alpha$  Therapeutic Responsiveness In Pediatric Inflammatory Bowel Disease (IBD). *Inflamm Bowel Dis*. 2010;16(8):1357. doi:10.1002/IBD.21174
116. Polushina T, Banerjee N, Giddaluru S, et al. Identification of pleiotropy at the gene level between psychiatric disorders and related traits. *Transl Psychiatry 2021 111*. 2021;11(1):1-9. doi:10.1038/s41398-021-01530-4
117. Rizzi TS, Arias-Vasquez A, Rommelse N, et al. The ATXN1 and TRIM31 genes are related to intelligence in an ADHD background: evidence from a large collaborative study totaling 4,963 subjects. *Am J Med Genet B Neuropsychiatr Genet*. 2011;156(2):145-157. doi:10.1002/AJMG.B.31149
118. Kiang KMY, Leung GKK. A Review on Adducin from Functional to Pathological Mechanisms: Future Direction in Cancer. *Biomed Res Int*. 2018;2018. doi:10.1155/2018/3465929
119. Thomas KN, Wang S, Zhang H, et al. Abstract 35: Gamma Adducin Dysfunction Leads To Cerebrovascular Distention, Blood Brain Barrier Leakage, And Cognitive Deficits In The Fawn-hooded Hypertensive Rats. *Hypertension*. 2021;78(Suppl\_1). doi:10.1161/HYP.78.SUPPL\_1.35
120. Byrne EM, Zhu Z, Qi T, et al. Conditional GWAS analysis to identify disorder-specific SNPs for psychiatric disorders. *Mol Psychiatry*. 2021;26(6):2070-2081. doi:10.1038/S41380-020-0705-9
121. Charney AW, Ruderfer DM, Stahl EA, et al. Evidence for genetic heterogeneity between clinical subtypes of bipolar disorder. *Transl Psychiatry*. 2017;7(1):e993. doi:10.1038/TP.2016.242

122. Rabenstein RL, Addy NA, Caldarone BJ, et al. Impaired Synaptic Plasticity and Learning in Mice Lacking  $\beta$ -Adducin, an Actin-Regulating Protein. *J Neurosci*. 2005;25(8):2138-2145.  
doi:10.1523/JNEUROSCI.3530-04.2005
123. Engmann O, Giralt A, Gervasi N, et al. DARPP-32 interaction with adducin may mediate rapid environmental effects on striatal neurons. *Nat Commun* 2015 61. 2015;6(1):1-14.  
doi:10.1038/ncomms10099
124. Yang H, Francis SC, Sellers K, et al. Hypertension-linked decrease in the expression of brain  $\gamma$ -adducin. *Circ Res*. 2002;91(7):633-639. doi:10.1161/01.RES.0000036749.73316.73
125. Cheng G, Tang CSM, Wong EHM, et al. Common genetic variants regulating ADD3 gene expression alter biliary atresia risk. *J Hepatol*. 2013;59(6):1285-1291. doi:10.1016/J.JHEP.2013.07.021
126. Acharya P, Kutum R, Pandey R, et al. First Degree Relatives of Patients with Celiac Disease Harbour an Intestinal Transcriptomic Signature that Might Protect them from Enterocyte Damage. *Clin Transl Gastroenterol*. 2018;9(10). doi:10.1038/S41424-018-0059-7
127. Zigmond E, Bernshtein B, Friedlander G, et al. Macrophage-restricted interleukin-10 receptor deficiency, but not IL-10 deficiency, causes severe spontaneous colitis. *Immunity*. 2014;40(5):720-733.  
doi:10.1016/J.IMMUNI.2014.03.012
128. Howrylak JA, Moll M, Weiss ST, Raby BA, Wu W, Xing EP. Gene expression profiling of asthma phenotypes demonstrates molecular signatures of atopy and asthma control. *J Allergy Clin Immunol*. 2016;137(5):1390-1397.e6. doi:10.1016/J.JACI.2015.09.058
129. Weiner JA, Jontes J. Protocadherins, not prototypical: A complex tale of their interactions, expression, and functions. *Front Mol Neurosci*. 2013;0(MARCH 2013):4. doi:10.3389/FNMOL.2013.00004/BIBTEX
130. Jia Z, Wu Q. Clustered Protocadherins Emerge as Novel Susceptibility Loci for Mental Disorders. *Front Neurosci*. 2020;14. doi:10.3389/FNINS.2020.587819
131. Pancho A, Aerts T, Mitsogiannis MD, Seuntjens E. Protocadherins at the Crossroad of Signaling Pathways. *Front Mol Neurosci*. 2020;13:117. doi:10.3389/FNMOL.2020.00117/BIBTEX
132. Lu, Zhou Y, Qiao P, Zheng J, Wu Q, Shen Q. The protocadherin alpha cluster is required for axon extension and myelination in the developing central nervous system. *Neural Regen Res*. 2018;13(3):427. doi:10.4103/1673-5374.228724

133. Fan L, Lu Y, Shen X, Shao H, Suo L, Wu Q. Alpha protocadherins and Pyk2 kinase regulate cortical neuron migration and cytoskeletal dynamics via rac1 GTPase and WAVE complex in mice. *Elife*. 2018;7. doi:10.7554/ELIFE.35242
134. Katori S, Noguchi-Katori Y, Okayama A, et al. Protocadherin- $\alpha$ 2 is required for diffuse projections of serotonergic axons. *Sci Reports 2017 71*. 2017;7(1):1-14. doi:10.1038/s41598-017-16120-y
135. Katori S, Hamada S, Noguchi Y, et al. Protocadherin- $\alpha$  Family Is Required for Serotonergic Projections to Appropriately Innervate Target Brain Areas. *J Neurosci*. 2009;29(29):9137-9147. doi:10.1523/JNEUROSCI.5478-08.2009
136. Xue L, Fergusson J, Salimi M, et al. Prostaglandin D2 and leukotriene E4 synergize to stimulate diverse TH2 functions and TH2 cell/neutrophil crosstalk. *J Allergy Clin Immunol*. 2015;135(5):1358-1366.e11. doi:10.1016/J.JACI.2014.09.006
137. Tellez GF, Willemse BWM, Brouwer U, et al. Protocadherin-1 Localization and Cell-Adhesion Function in Airway Epithelial Cells in Asthma. *PLoS One*. 2016;11(10):e0163967. doi:10.1371/JOURNAL.PONE.0163967
138. Kozu Y, Gon Y, Maruoka S, et al. Protocadherin-1 is a glucocorticoid-responsive critical regulator of airway epithelial barrier function. *BMC Pulm Med 2015 151*. 2015;15(1):1-12. doi:10.1186/S12890-015-0078-Z
139. SW C, DA S, NE G-L, et al. Intestinal brush border assembly driven by protocadherin-based intermicrovillar adhesion. *Cell*. 2014;157(2):433-446. doi:10.1016/J.CELL.2014.01.067
140. Robertson IB, Horiguchi M, Zilberberg L, Dabovic B, Hadjiolova K, Rifkin DB. Latent TGF- $\beta$ -binding proteins. *Matrix Biol*. 2015;47:44. doi:10.1016/J.MATBIO.2015.05.005
141. Rauf B, Irum B, Khan SY, et al. Novel mutations in LTBP2 identified in familial cases of primary congenital glaucoma. *Mol Vis*. 2020;26:14. Accessed February 4, 2022. </labs/pmc/articles/PMC7043638/>
142. Désir J, Sznajder Y, Depasse F, et al. LTBP2 null mutations in an autosomal recessive ocular syndrome with megalocornea, spherophakia, and secondary glaucoma. *Eur J Hum Genet 2010 187*. 2010;18(7):761-767. doi:10.1038/ejhg.2010.11
143. Mižíková I, Morty RE. The extracellular matrix in bronchopulmonary dysplasia: Target and source. *Front*

*Med.* 2015;2(DEC):91. doi:10.3389/FMED.2015.00091/BIBTEX

144. Enomoto Y, Matsushima S, Shibata K, et al. LTBP2 is secreted from lung myofibroblasts and is a potential biomarker for idiopathic pulmonary fibrosis. *Clin Sci (Lond)*. 2018;132(14):1565-1580. doi:10.1042/CS20180435
145. Huo R, Tian X, Chang Q, et al. Targeted inhibition of  $\beta$ -catenin alleviates airway inflammation and remodeling in asthma via modulating the profibrotic and anti-inflammatory actions of transforming growth factor- $\beta$ 1. *Thor Adv Respir Dis*. 2021;15. doi:10.1177/1753466620981858
146. Speca S, Giusti I, Rieder F, Latella G. Cellular and molecular mechanisms of intestinal fibrosis. *World J Gastroenterol*. 2012;18(28):3635. doi:10.3748/WJG.V18.I28.3635
147. Troncone E, Marafini I, Stolfi C, Monteleone G. Transforming growth factor- $\beta$ 1/Smad7 in intestinal immunity, inflammation, and cancer. *Front Immunol*. 2018;9(JUN):1407. doi:10.3389/FIMMU.2018.01407/BIBTEX
148. Schokker D, Jansman AJM, Veninga G, et al. Perturbation of microbiota in one-day old broiler chickens with antibiotic for 24 hours negatively affects intestinal immune development. *BMC Genomics*. 2017;18(1):1-14. doi:10.1186/S12864-017-3625-6/FIGURES/5
149. Chen J, Gao G, Wang H, Ye X, Zhou J, Lin J. Expression and clinical significance of latent-transforming growth factor beta-binding protein 2 in primary hepatocellular carcinoma. *Medicine (Baltimore)*. 2019;98(39). doi:10.1097/MD.00000000000017216
150. Wang J, Jiang C, Li N, et al. The circEPST11/mir-942-5p/LTBP2 axis regulates the progression of OSCC in the background of OSF via EMT and the PI3K/Akt/mTOR pathway. *Cell Death Dis* 2020 118. 2020;11(8):1-18. doi:10.1038/s41419-020-02851-w
151. Ahmad R, Dalziel JE. G Protein-Coupled Receptors in Taste Physiology and Pharmacology. *Front Pharmacol*. 2020;11:1771. doi:10.3389/FPHAR.2020.587664/BIBTEX
152. Mao GF, Jin J, Kunapuli SP, Rao AK. Nuclear factor- $\kappa$ B regulates expression of platelet phospholipase C- $\beta$ 2 (PLCB2). *Thromb Haemost*. 2016;116(5):931-940. doi:10.1160/TH15-09-0749
153. Lin JR, Cai Y, Zhang Q, Zhang W, Nogales-Cadenas R, Zhang ZD. Integrated post-GWAS analysis sheds new light on the disease mechanisms of schizophrenia. *Genetics*. 2016;204(4):1587-1600. doi:10.1534/GENETICS.116.187195/-/DC1/FIGURES18.PDF

154. Li H, Li X, Smerin SE, et al. Mitochondrial gene expression profiles and metabolic pathways in the amygdala associated with exaggerated fear in an animal model of PTSD. *Front Neurol.* 2014;5 AUG. doi:10.3389/FNEUR.2014.00164/ABSTRACT
155. Kawakami T, Xiao W. Phospholipase C- $\beta$  in immune cells. *Adv Biol Regul.* 2013;53(3):249-257. doi:10.1016/J.JBIOR.2013.08.001
156. Bach TL, Chen Q-M, Kerr WT, et al. Phospholipase cbeta is critical for T cell chemotaxis. *J Immunol.* 2007;179(4):2223-2227. doi:10.4049/JIMMUNOL.179.4.2223
157. Wang L, Zhou Y, Chen Z, et al. PLC $\beta$ 2 negatively regulates the inflammatory response to virus infection by inhibiting phosphoinositide-mediated activation of TAK1. *Nat Commun* 2019 101. 2019;10(1):1-13. doi:10.1038/s41467-019-08524-3
158. Zhang NZ, Chen XJ, Mu YH, Wang H. Identification of differentially expressed genes in childhood asthma. *Medicine (Baltimore).* 2018;97(21). doi:10.1097/MD.0000000000010861
159. Alazami AM, Patel N, Shamseldin HE, et al. Accelerating Novel Candidate Gene Discovery in Neurogenetic Disorders via Whole-Exome Sequencing of Prescreened Multiplex Consanguineous Families. *Cell Rep.* 2015;10(2):148-161. doi:10.1016/J.CELREP.2014.12.015
160. Dunn EC, Soare TW, Zhu Y, et al. Sensitive periods for the effect of childhood adversity on DNA methylation: Results from a prospective, longitudinal study. *Biol Psychiatry.* 2019;85(10):838. doi:10.1016/J.BIOPSYCH.2018.12.023
161. Gondalia R, Baldassari A, Holliday KM, et al. Methylome-wide association study provides evidence of particulate matter air pollution-associated DNA methylation. *Environ Int.* 2019;132:104723. doi:10.1016/J.ENVINT.2019.03.071
162. Uckelmann H, Blaszkiewicz S, Nicolae C, et al. Extracellular matrix protein Matrilin-4 regulates stress-induced HSC proliferation via CXCR4. *J Exp Med.* 2016;213(10):1961-1971. doi:10.1084/JEM.20151713
163. Alcantara D, Timms AE, Gripp K, et al. Mutations of AKT3 are associated with a wide spectrum of developmental disorders including extreme megalencephaly. *Brain.* 2017;140(10):2610-2622. doi:10.1093/BRAIN/AWX203
164. Matsuda S, Ikeda Y, Murakami M, Nakagawa Y, Tsuji A, Kitagishi Y. Roles of PI3K/AKT/GSK3 Pathway



Involved in Psychiatric Illnesses. *Dis* 2019, Vol 7, Page 22. 2019;7(1):22.

doi:10.3390/DISEASES7010022

165. Howell KR, Floyd K, Law AJ. PKBy/AKT3 loss-of-function causes learning and memory deficits and deregulation of AKT/mTORC2 signaling: Relevance for schizophrenia. *PLoS One*. 2017;12(5). doi:10.1371/JOURNAL.PONE.0175993
166. Wong H, Levenga J, Laplante L, et al. Isoform-specific roles for AKT in affective behavior, spatial memory, and extinction related to psychiatric disorders. *Elife*. 2020;9:1-27. doi:10.7554/ELIFE.56630
167. Bergeron Y, Bureau G, Laurier-Laurin MÉ, Asselin E, Massicotte G, Cyr M. Genetic Deletion of Akt3 Induces an Endophenotype Reminiscent of Psychiatric Manifestations in Mice. *Front Mol Neurosci*. 2017;10. doi:10.3389/FNMOL.2017.00102
168. Kitz A, Marcken M de, Gautron A-S, Mitrovic M, Hafler DA, Dominguez-Villar M. AKT isoforms modulate Th1-like Treg generation and function in human autoimmune disease. *EMBO Rep*. 2016;17(8):1169-1183. doi:10.15252/EMBR.201541905
169. DuBois JC, Ray AK, Gruber RC, et al. Akt3-Mediated Protection Against Inflammatory Demyelinating Disease. *Front Immunol*. 2019;10:1738. doi:10.3389/FIMMU.2019.01738/FULL
170. Tshiperson V, Gruber RC, Goldberg MF, et al. Suppression of Inflammatory Responses during Myelin Oligodendrocyte Glycoprotein–Induced Experimental Autoimmune Encephalomyelitis Is Regulated by AKT3 Signaling. *J Immunol*. 2013;190(4):1528-1539. doi:10.4049/JIMMUNOL.1201387
171. White JH, Chiano M, Wigglesworth M, et al. Identification of a novel asthma susceptibility gene on chromosome 1qter and its functional evaluation. *Hum Mol Genet*. 2008;17(13). doi:10.1093/hmg/ddn087
172. Ugboode C, West RJH. Lessons learned from CHMP2B, implications for frontotemporal dementia and amyotrophic lateral sclerosis. *Neurobiol Dis*. 2021;147:105144. doi:10.1016/J.NBD.2020.105144
173. Zhang R, Song J, Isgren A, et al. Genome-wide study of immune biomarkers in cerebrospinal fluid and serum from patients with bipolar disorder and controls. *Transl Psychiatry*. 2020;10(1). doi:10.1038/S41398-020-0737-6
174. Yang L, Shi T, Liu F, et al. REV3L, a promising target in regulating the chemosensitivity of cervical cancer cells. *PLoS One*. 2015;10(3). doi:10.1371/journal.pone.0120334
175. Wittschieben JP, Patil V, Glushets V, Robinson LJ, Kusewitt DF, Wood RD. Loss of DNA polymerase  $\zeta$

- enhances spontaneous tumorigenesis. *Cancer Res.* 2010;70(7). doi:10.1158/0008-5472.CAN-09-4267
176. Huang KK, Jang KW, Kim S, et al. Exome sequencing reveals recurrent REV3L mutations in cisplatin-resistant squamous cell carcinoma of head and neck. *Sci Rep.* 2016;6. doi:10.1038/srep19552
177. Zhu X, Zou S, Zhou J, et al. REV3L, the catalytic subunit of DNA polymerase  $\zeta$ , is involved in the progression and chemoresistance of esophageal squamous cell carcinoma. *Oncol Rep.* 2016;35(3). doi:10.3892/or.2016.4549
178. Jamwal RS, Mahajan N, Bhat GR, et al. REV3L single nucleotide variants lead to increased susceptibility towards non-small cell lung cancer in the population of Jammu and Kashmir. *Cancer Epidemiol.* 2021;75. doi:10.1016/j.canep.2021.102047
179. Martin SK, Tomida J, Wood RD. Disruption of DNA polymerase  $\zeta$  engages an innate immune response. *Cell Rep.* 2021;34(8). doi:10.1016/j.celrep.2021.108775
180. Lange SS, Wittschieben JP, Wood RD. DNA polymerase zeta is required for proliferation of normal mammalian cells. *Nucleic Acids Res.* 2012;40(10). doi:10.1093/nar/gks054
181. Tomas-Roca L, Tsaalbi-Shtylik A, Jansen JG, et al. De novo mutations in PLXND1 and REV3L cause Möbius syndrome. *Nat Commun.* 2015;6. doi:10.1038/ncomms8199
182. O-Wang J, Kajiwara K, Kawamura K, et al. An essential role for REV3 in mammalian cell survival: Absence of REV3 induces p53-independent embryonic death. *Biochem Biophys Res Commun.* 2002;293(3). doi:10.1016/S0006-291X(02)00341-8
183. Govind N, Choudhury A, Hodkinson B, et al. Immunochip identifies novel, and replicates known, genetic risk loci for rheumatoid arthritis in black South Africans. *Mol Med.* 2014;20(1). doi:10.2119/molmed.2014.00097
184. Li X, Commane M, Nie H, et al. Act1, an NF- $\kappa$ B-activating protein. *Proc Natl Acad Sci U S A.* 2000;97(19). doi:10.1073/pnas.160265197
185. Qian Y, Liu C, Hartupee J, et al. The adaptor Act1 is required for interleukin 17 - Dependent signaling associated with autoimmune and inflammatory disease. *Nat Immunol.* 2007;8(3). doi:10.1038/ni1439
186. Hunter CA. Act1-ivating IL-17 inflammation. *Nat Immunol.* 2007;8(3). doi:10.1038/ni0307-232
187. Mummidi S, Das NA, Carpenter AJ, et al. RECK suppresses interleukin-17/TRAF3IP2-mediated MMP-13 activation and human aortic smooth muscle cell migration and proliferation. *J Cell Physiol.*

2019;234(12). doi:10.1002/jcp.28792

188. Valente AJ, Irimpen AM, Siebenlist U, Chandrasekar B. OxLDL induces endothelial dysfunction and death via TRAF3IP2: Inhibition by HDL3 and AMPK activators. *Free Radic Biol Med*. 2014;70. doi:10.1016/j.freeradbiomed.2014.02.014
189. Sakamuri SSVP, Higashi Y, Sukhanov S, et al. TRAF3IP2 mediates atherosclerotic plaque development and vulnerability in ApoE<sup>-/-</sup> mice. *Atherosclerosis*. 2016;252. doi:10.1016/j.atherosclerosis.2016.05.029
190. Padilla J, Carpenter AJ, Das NA, et al. TRAF3IP2 mediates high glucose-induced endothelin-1 production as well as endothelin-1-induced inflammation in endothelial cells. *Am J Physiol - Hear Circ Physiol*. 2018;314(1). doi:10.1152/ajpheart.00478.2017
191. Venkatesan B, Valente AJ, Das NA, et al. CIKS (Act1 or TRAF3IP2) mediates high glucose-induced endothelial dysfunction. *Cell Signal*. 2013;25(1). doi:10.1016/j.cellsig.2012.10.009
192. Grunewald ZI, Ramirez-Perez FI, Woodford ML, et al. TRAF3IP2 (TRAF3 interacting protein 2) mediates obesity-associated vascular insulin resistance and dysfunction in male mice. *Hypertension*. Published online 2020. doi:10.1161/HYPERTENSIONAHA.120.15262
193. Shafer S, Yao Y, Comrie W, et al. Two patients with chronic mucocutaneous candidiasis caused by TRAF3IP2 deficiency. *J Allergy Clin Immunol*. 2021;148(1). doi:10.1016/j.jaci.2020.12.629
194. Hüffmeier U, Uebe S, Ekici AB, et al. Common variants at TRAF3IP2 are associated with susceptibility to psoriatic arthritis and psoriasis. *Nat Genet*. 2010;42(11):996-999. doi:10.1038/ng.688
195. Ellinghaus E, Ellinghaus D, Stuart PE, et al. Genome-wide association study identifies a psoriasis susceptibility locus at TRAF3IP2. *Nat Genet*. 2010;42(11):991-995. doi:10.1038/ng.689
196. Ciccacci C, Biancone L, Fusco D Di, et al. TRAF3IP2 gene is associated with cutaneous extraintestinal manifestations in Inflammatory Bowel Disease. *J Crohn's Colitis*. 2013;7(1). doi:10.1016/j.crohns.2012.02.020
197. Ciccacci C, Rufini S, Mancinelli S, et al. A pharmacogenetics study in Mozambican patients treated with Nevirapine: Full resequencing of TRAF3IP2 gene shows a novel association with SJS/TEN susceptibility. *Int J Mol Sci*. 2015;16(3). doi:10.3390/ijms16035830
198. DaRosa PA, Wang Z, Jiang X, et al. Allosteric activation of the RNF146 ubiquitin ligase by a poly(ADP-ribose)ation signal. *Nature*. 2014;517(7533). doi:10.1038/nature13826

199. Huang SMA, Mishina YM, Liu S, et al. Tankyrase inhibition stabilizes axin and antagonizes Wnt signalling. *Nature*. 2009;461(7264). doi:10.1038/nature08356
200. Smith S, Giriat I, Schmitt A, Lange T De. Tankyrase, a poly(ADP-ribose) polymerase at human telomeres. *Science (80- )*. 1998;282(5393). doi:10.1126/science.282.5393.1484
201. Chi NW, Lodish HF. Tankyrase is a Golgi-associated mitogen-activated protein kinase substrate that interacts with IRAP in GLUT4 vesicles. *J Biol Chem*. 2000;275(49). doi:10.1074/jbc.M007635200
202. Haikarainen T, Krauss S, Lehtio L. Tankyrases: Structure, Function and Therapeutic Implications in Cancer. *Curr Pharm Des*. 2014;20(41). doi:10.2174/1381612820666140630101525
203. Fuchs U, Rehkamp GF, Slany R, Follo M, Borkhardt A. The formin-binding protein 17, FBP17, binds via a TNKS binding motif to tankyrase, a protein involved in telomere maintenance. *FEBS Lett*. 2003;554(1-2). doi:10.1016/S0014-5793(03)01063-9
204. Li Z, Yamauchi Y, Kamakura M, et al. Herpes Simplex Virus Requires Poly(ADP-Ribose) Polymerase Activity for Efficient Replication and Induces Extracellular Signal-Related Kinase-Dependent Phosphorylation and ICP0-Dependent Nuclear Localization of Tankyrase 1. *J Virol*. 2012;86(1). doi:10.1128/jvi.05897-11
205. Deng Z, Atanasiu C, Zhao K, et al. Inhibition of Epstein-Barr Virus OriP Function by Tankyrase, a Telomere-Associated Poly-ADP Ribose Polymerase That Binds and Modifies EBNA1. *J Virol*. 2005;79(8). doi:10.1128/jvi.79.8.4640-4650.2005
206. Scherag A, Dina C, Hinney A, et al. Two new loci for body-weight regulation identified in a joint analysis of genome-wide association studies for early-onset extreme obesity in French and German study groups. *PLoS Genet*. 2010;6(4). doi:10.1371/journal.pgen.1000916

## Supplementary Figures

**eFigure 1.** Flow Chart of the Study Design and Analysis Plan

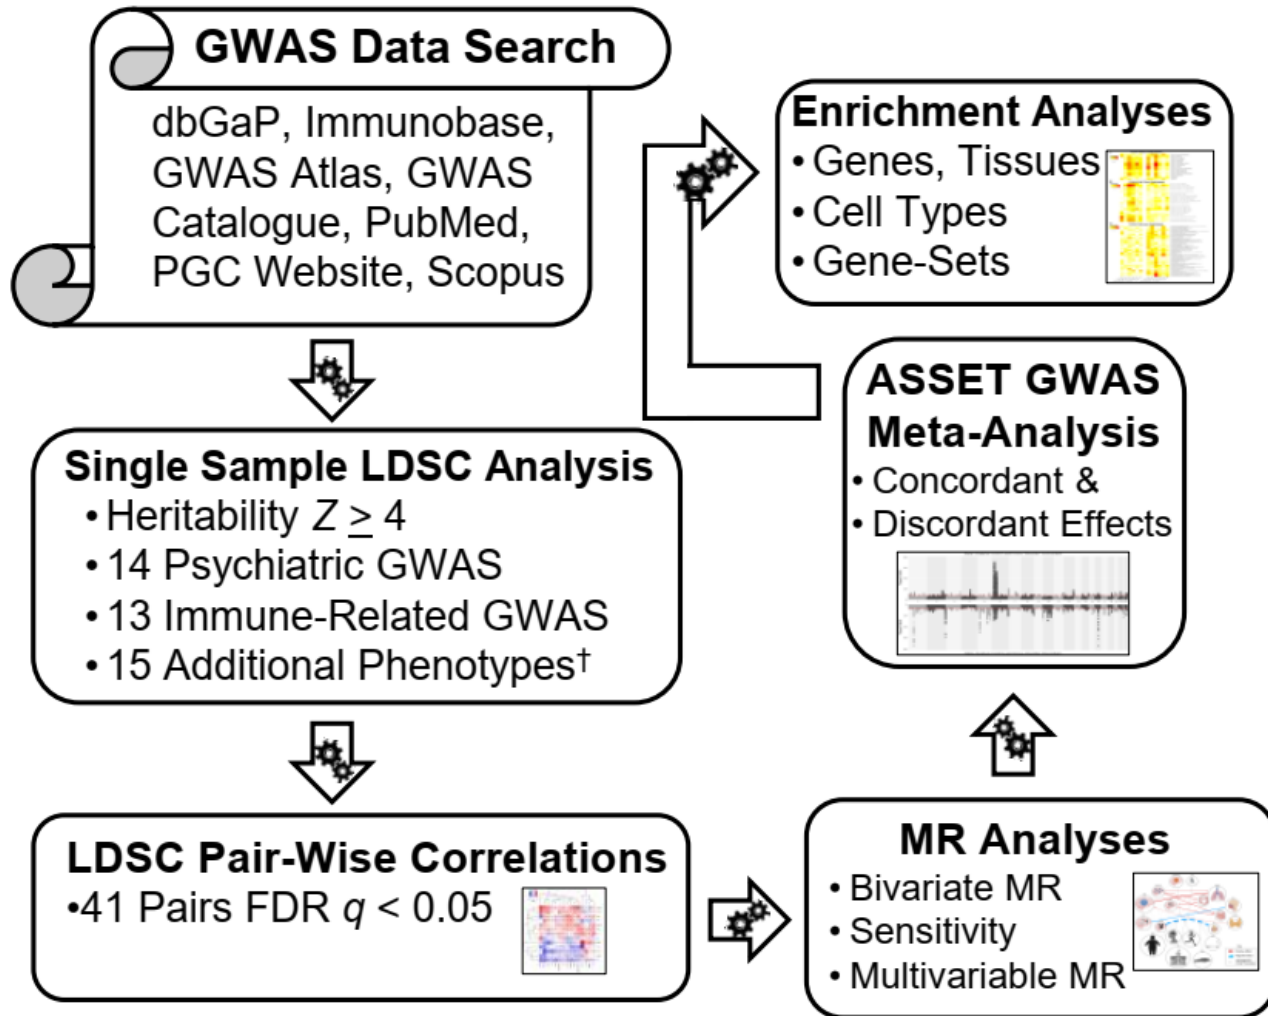

**S. Figure 1 Legend.** Study design and analysis plan with miniaturized depictions of the corresponding Figures and S. Figures to orient and guide readers. The top-left panel depicts literature and databases searched for relevant GWAS summary statistics. The mid-left panel depicts LD-score regression (LDSC) analysis to estimate SNP heritability Z-score, resulting in a final set of phenotypes. The bottom-left panel depicts pairwise evaluation of genetic correlations among psychiatric, immune-related, and third variable phenotypes using LDSC. A set of 44 correlated psychiatric-immune pairs (FDR  $q < 0.05$ ) were investigated for bidirectional Mendelian randomization (MR) effects with sensitivity analyses. Multivariable MR (MVMR) was used to adjust for effects of additional phenotypes (depicted in the bottom-center panel). Significant psychiatric instrument loci with positive effects on immune outcomes were interrogated for enriched genes, tissues, and gene-sets using FUMA's *GENE2FUNCTION* analysis (middle-center panel). For phenotype pairs demonstrating robust MR effects, two-sided GWAS meta-analysis identified subsets of SNPs with concordant and discordant effects (bottom right panel), and these SNP subsets were characterized for enriched genes tissues, cell-types, gene-sets, and genes was performed with FUMA SNP2GENE function (middle-center panel).

**eFigure 2.** Genetic Correlations Among Psychiatric Disorders and Immune-Related Traits and Other Risk Factors

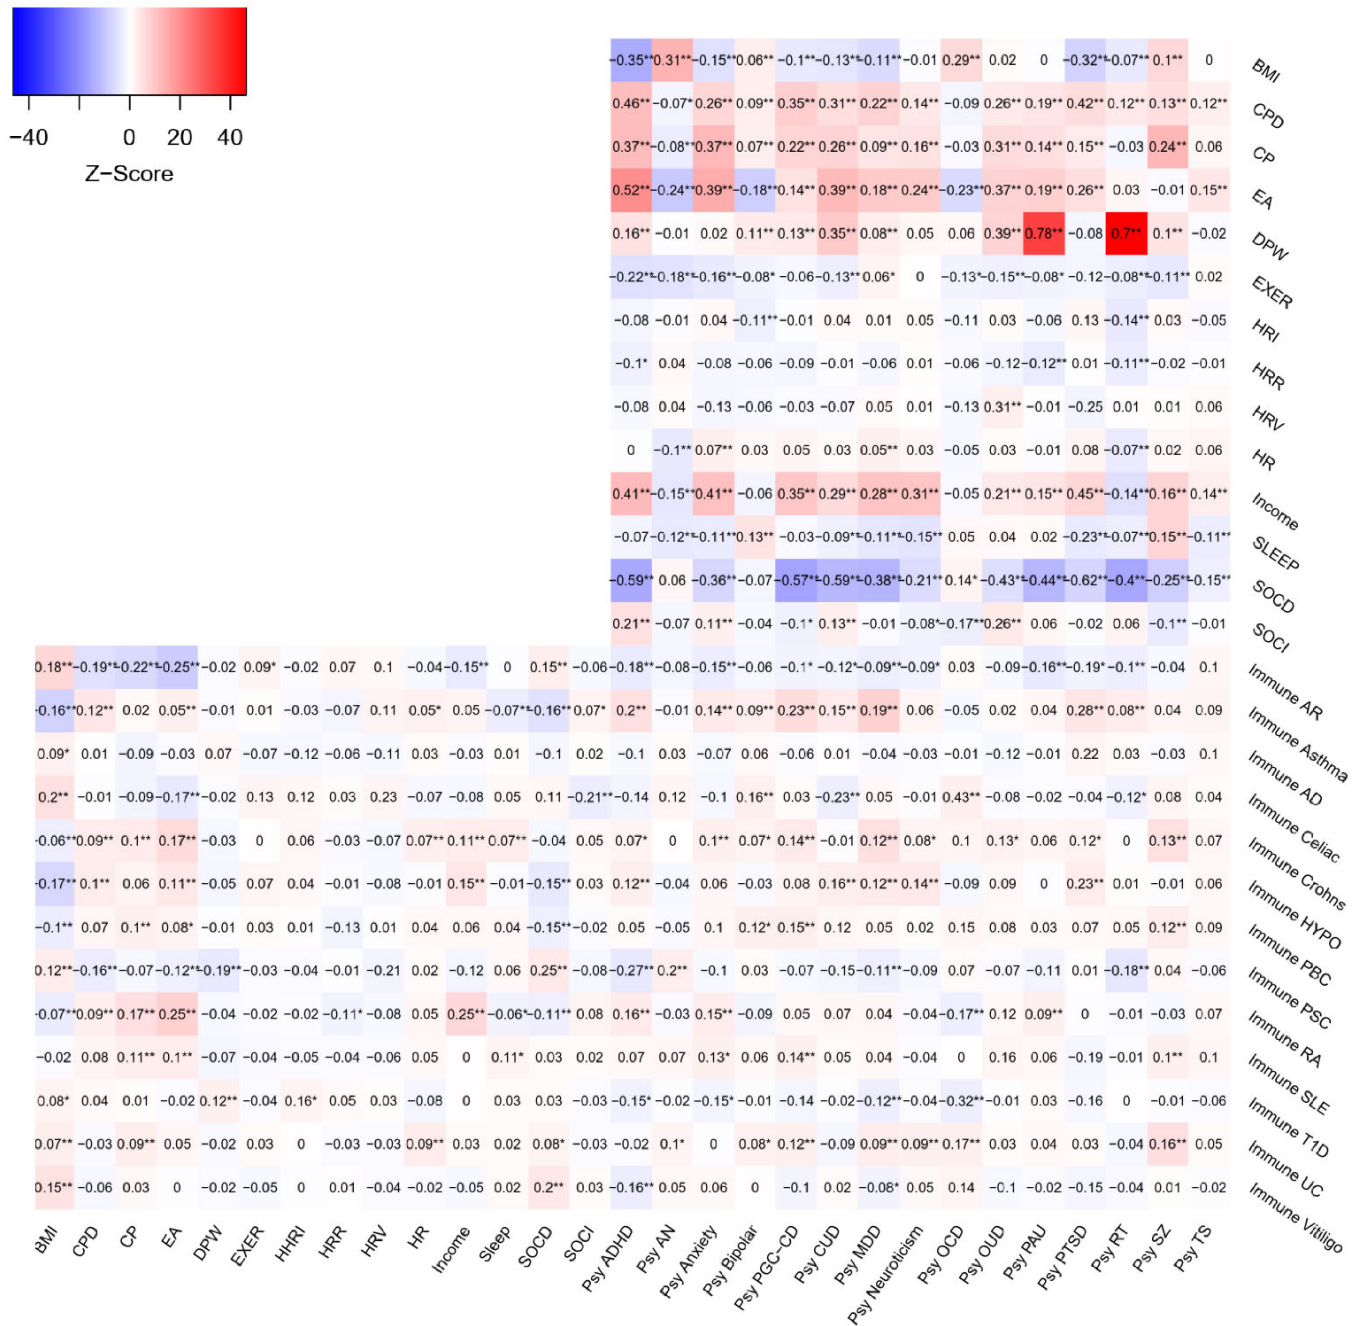

Genetic correlation coefficients (text) and z-score (color) between psychiatric (X-axis), immune-related (Y-axis), and third variable phenotypes (both axes). Increasing intensity of red color indicates positive correlations and increasing intensity of blue indicates negative correlations. Correlations reaching uncorrected  $p < 0.05$  are denoted with \*, while those reaching false discovery rate  $q < 0.05$  (reflecting correction for a total 587 unique tests) are denoted with \*\*. Abbreviations include allergic rhinitis (AR), anorexia nervosa (AN), atopic dermatitis (AD), attention-deficit hyperactivity disorder (ADHD), body mass index (BMI), cannabis use disorder (CUD), cigarettes per day (CPD), cognitive processing (CP), alcoholic drinks per week (DPW), educational attainment (EA), frequency of moderate intensity exercise (EXER), heart rate (HR), heart rate increase during exercise (HRI), heart rate recovery after exercise (HRR), heart rate variability (HRV), hypothyroidism (HYPO), obsessive compulsive disorder (OCD), post-traumatic stress disorder (PTSD), primary biliary cirrhosis (PBC),

primary sclerosing cholangitis (PSC), problematic alcohol use (PAU), rheumatoid arthritis (RA), risk-tolerance (RT), sleep duration (SLEEP), social deprivation *via* the Townsend Index (SOCD), social interaction frequency (SOI), schizophrenia (SZ), systemic lupus erythematosus (SLE), Tourette's syndrome (TS), type 1 diabetes (T1D), ulcerative colitis (UC). Full results are also provided in S. Table 2.

**eFigure 3. MVMR Effects After Adjustment for Other Risk Factors**

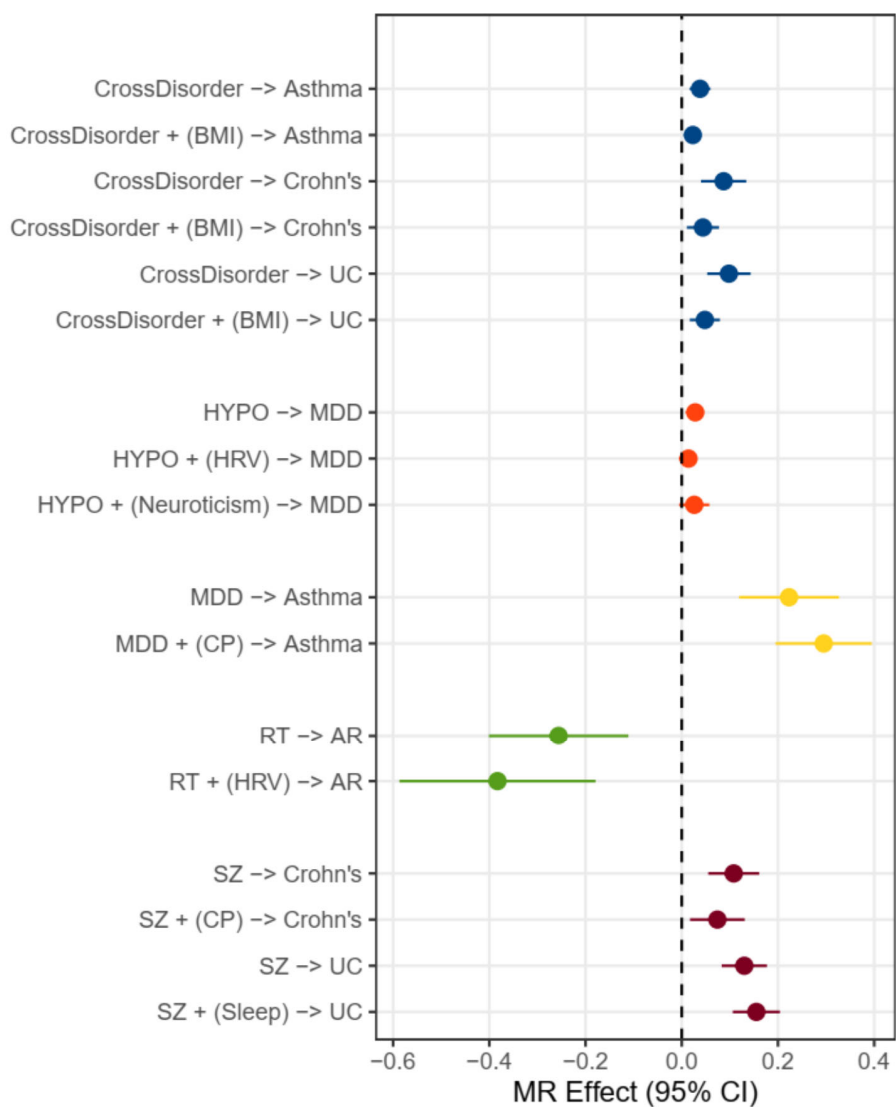

Multivariable Mendelian randomization results, depicting effect sizes with 95% confidence intervals with and without adjustment for the additional phenotypes. Full results of these analyses are provided in S. Table 3. Abbreviations include body mass index (BMI), cognitive processing (CP), heart rate variability (HRV), hypothyroidism (HYPO), major depressive disorder (MDD), schizophrenia (SZ), ulcerative colitis (UC).



**eFigure 4. A through F.** Miami Plots Depicting Concordant and Discordant Effects Identified via 2-Sided Meta-Analysis of Psychiatric-Immune Phenotype Pairs

4A.

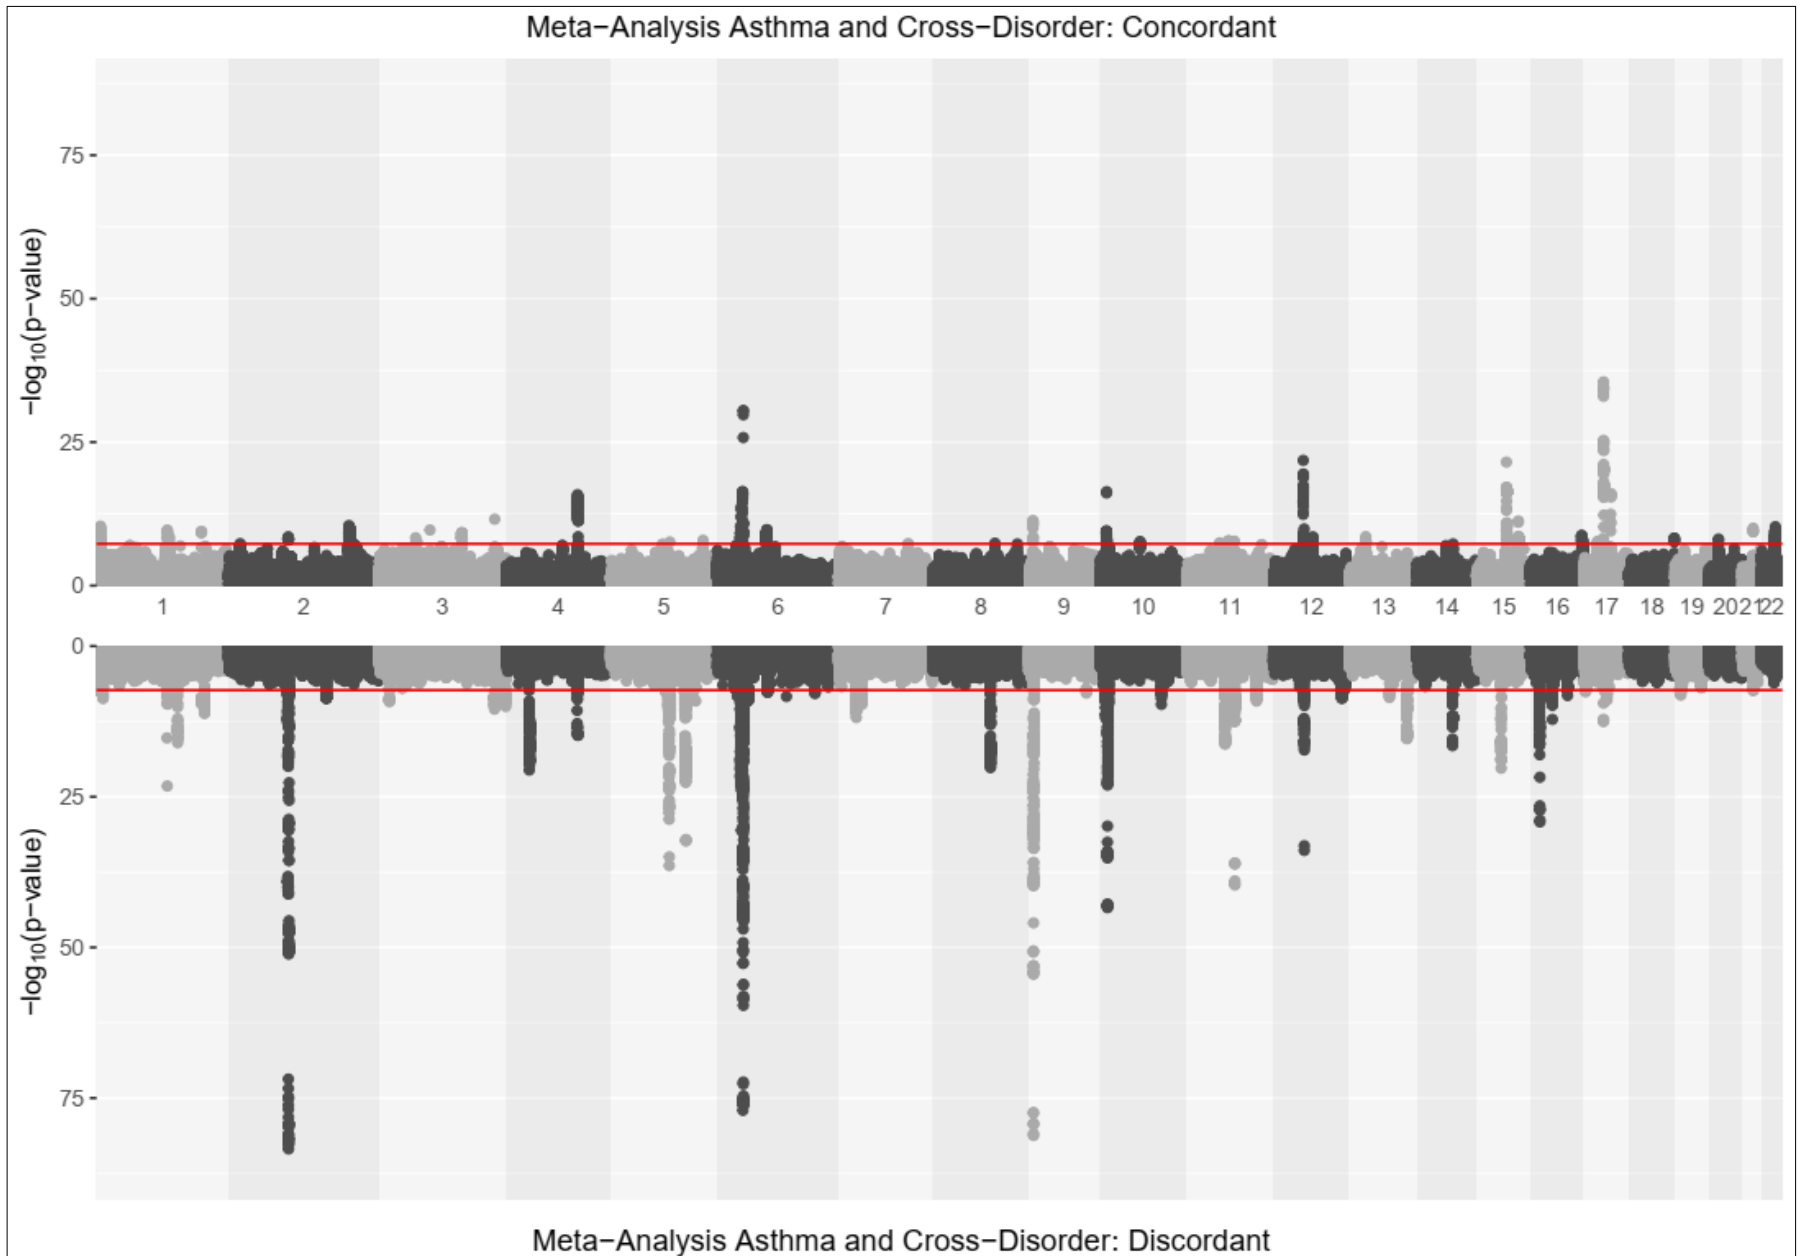

4B.

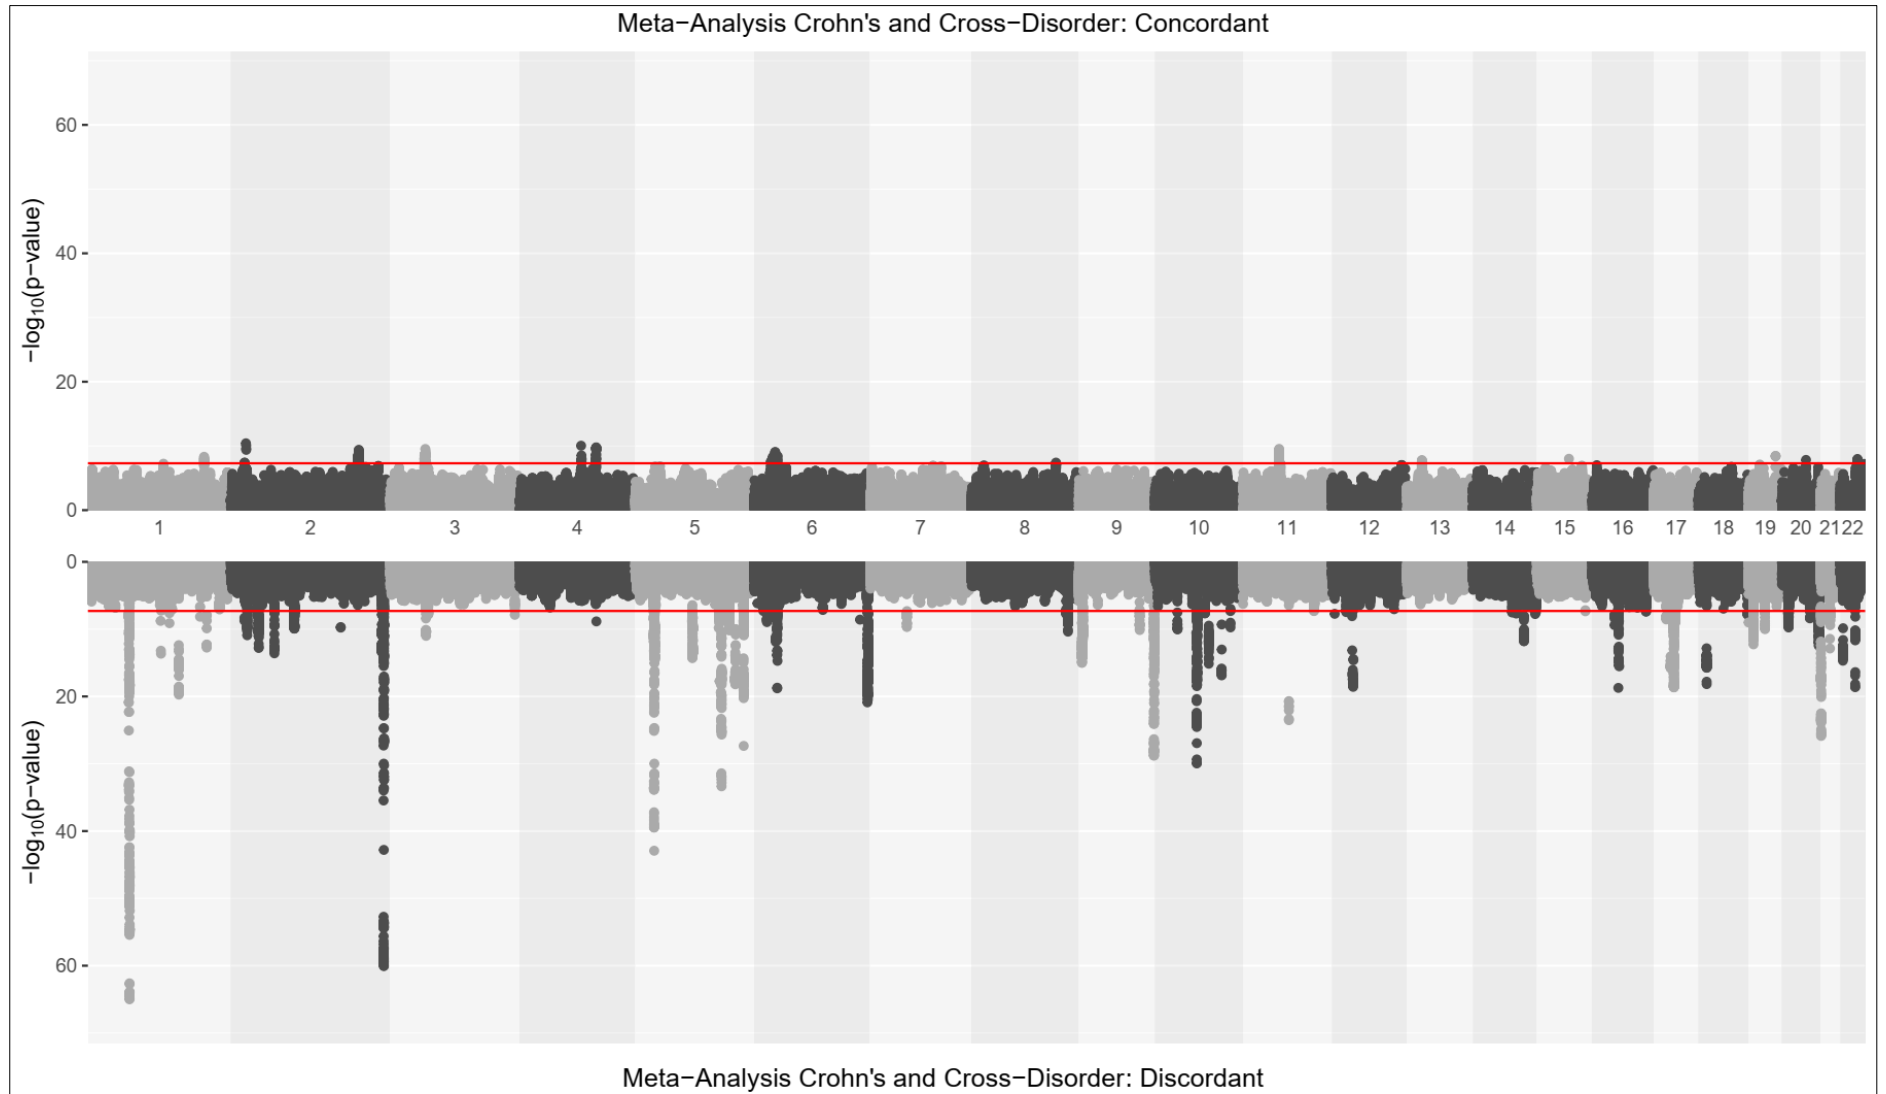

4C.

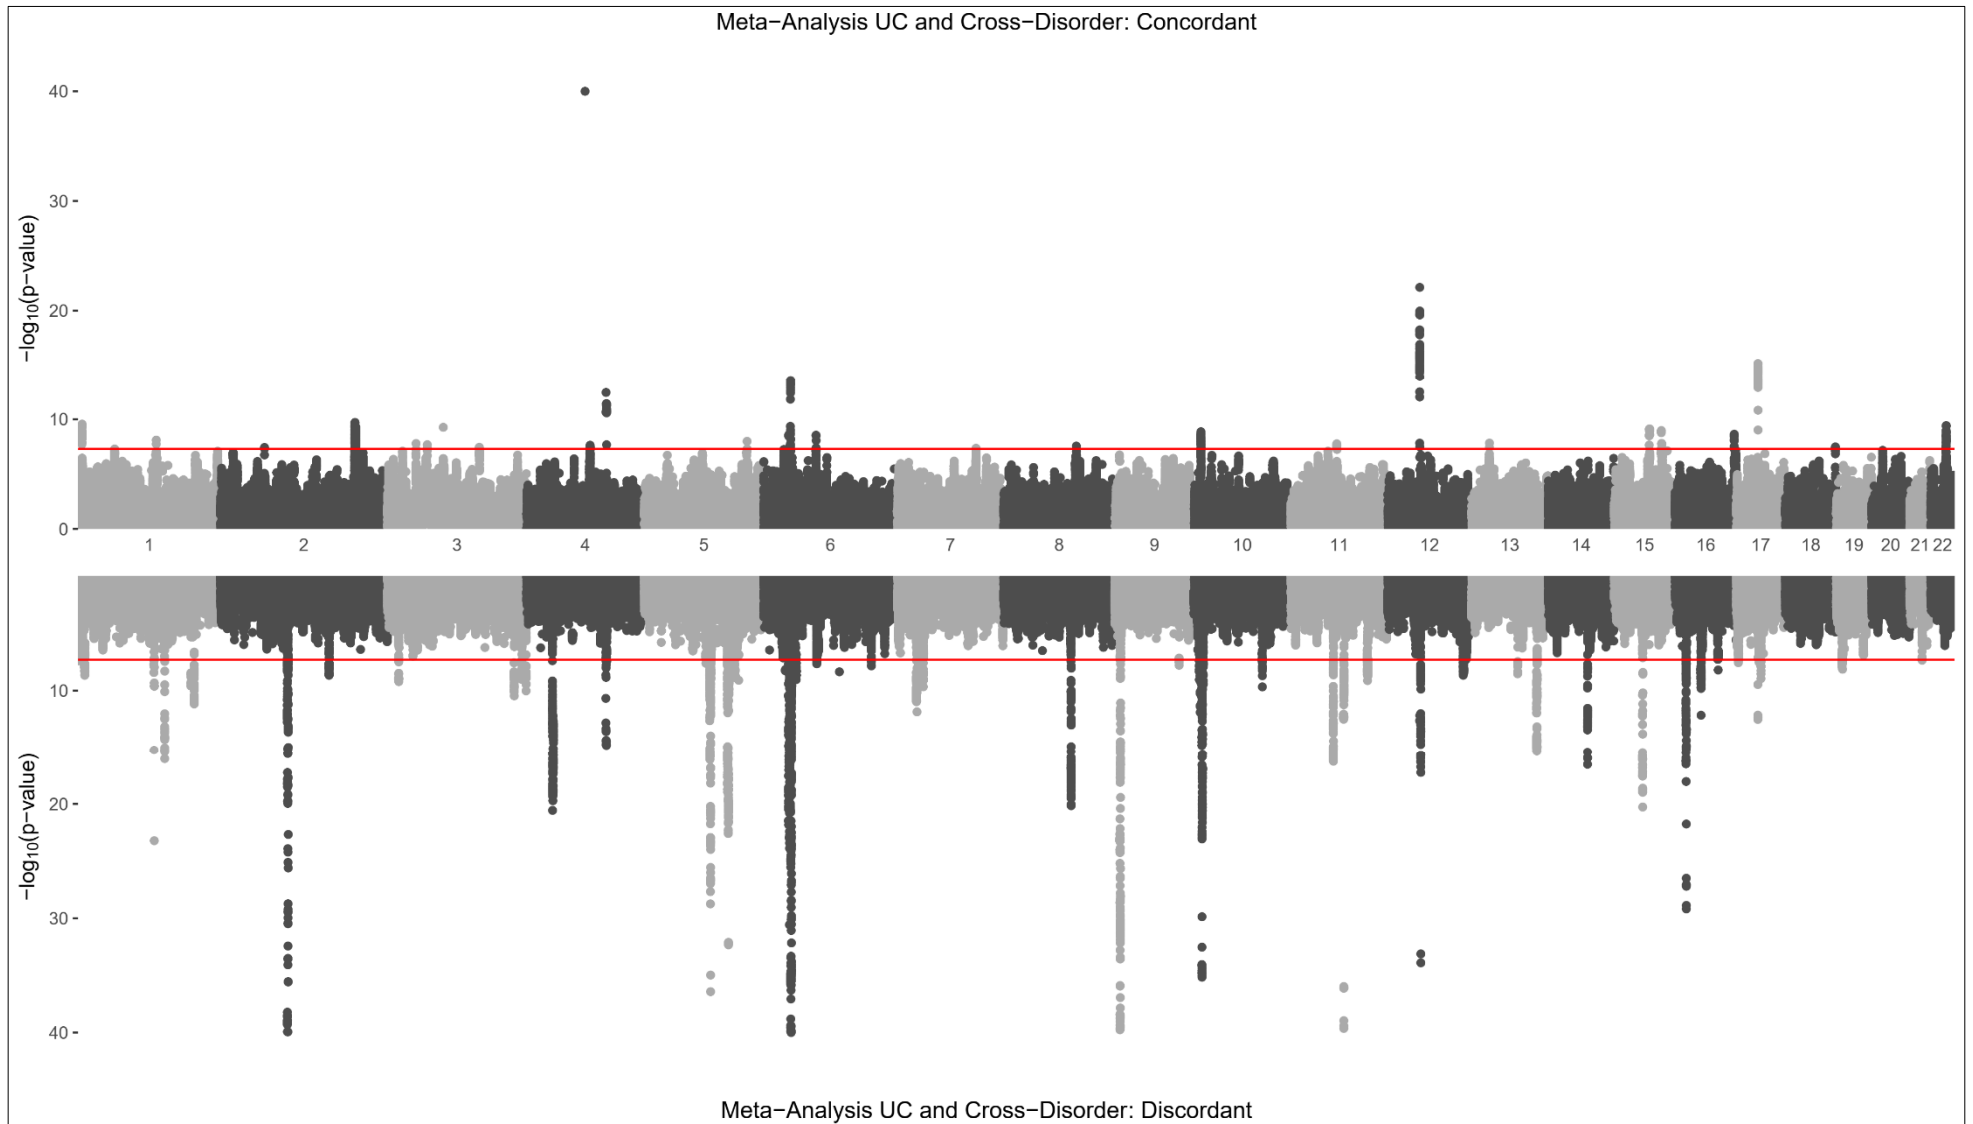

4D.

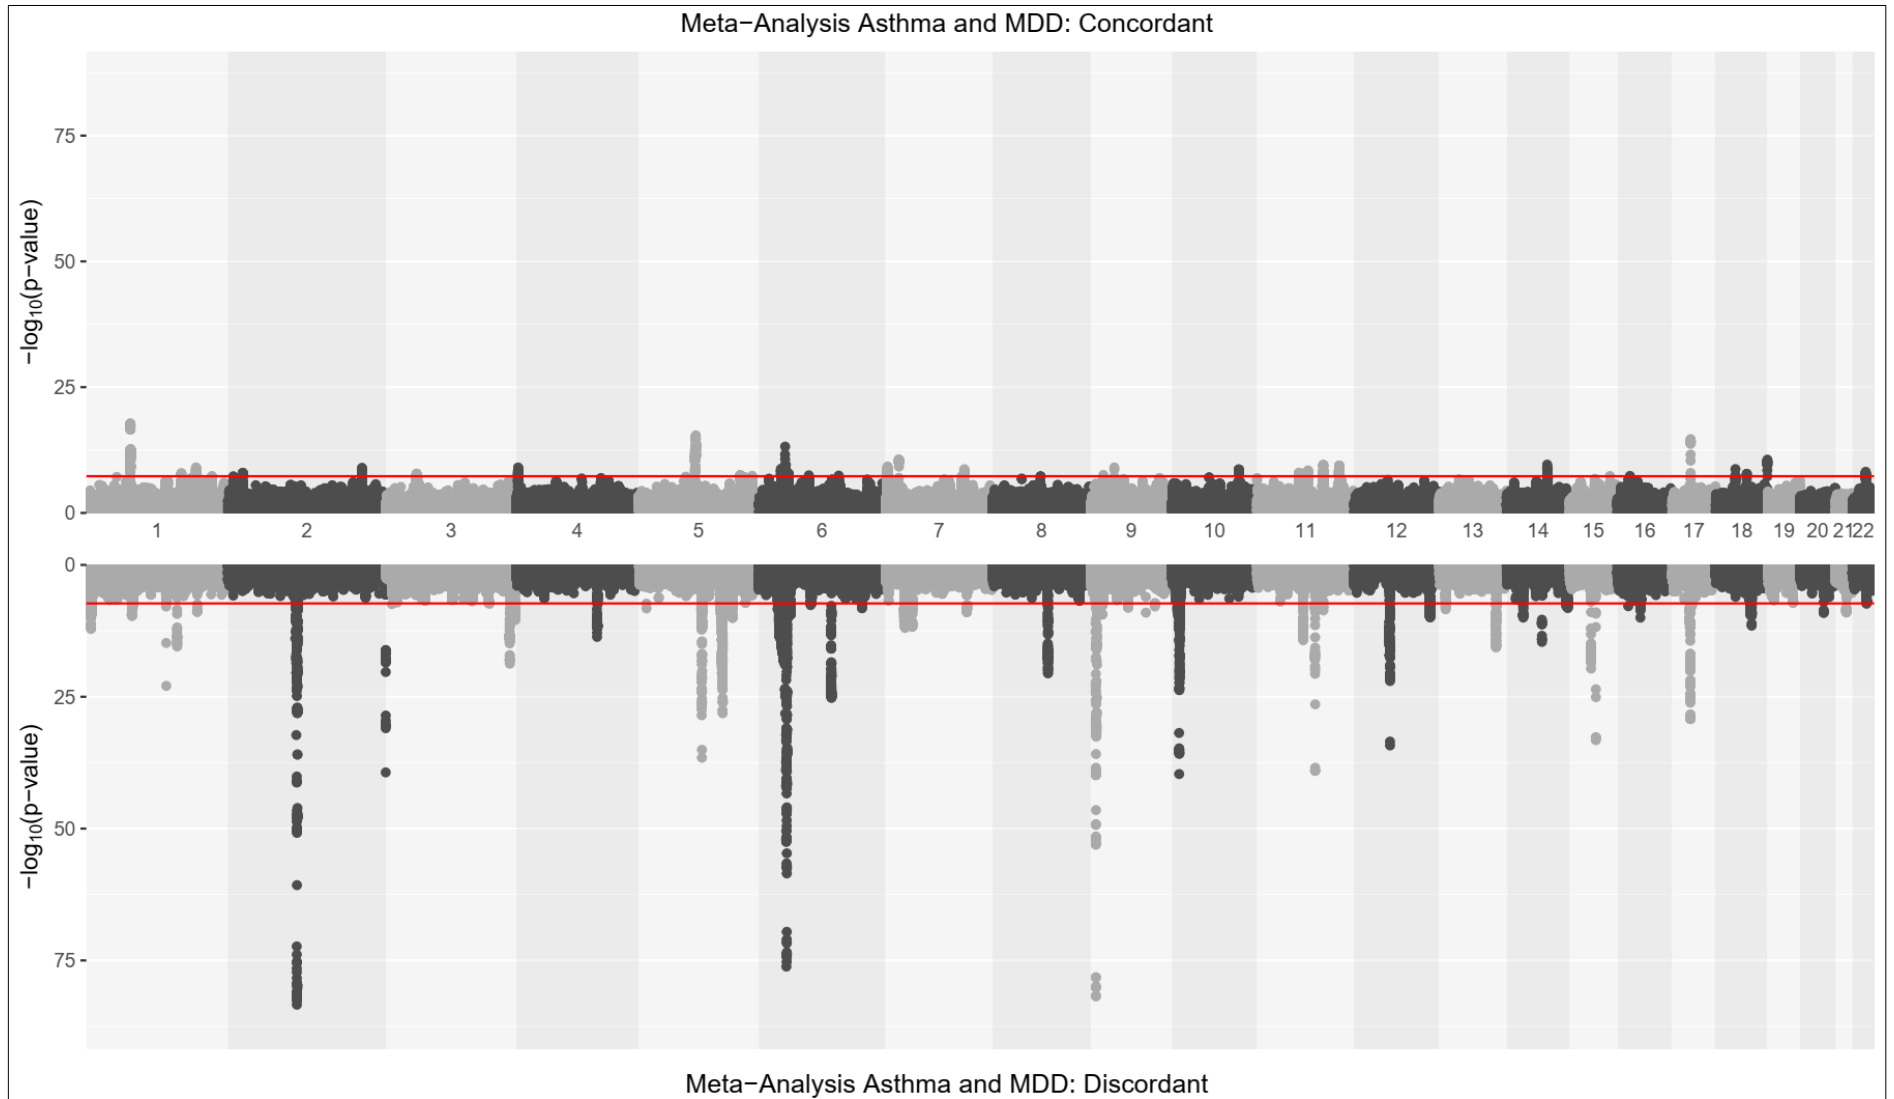

4E.

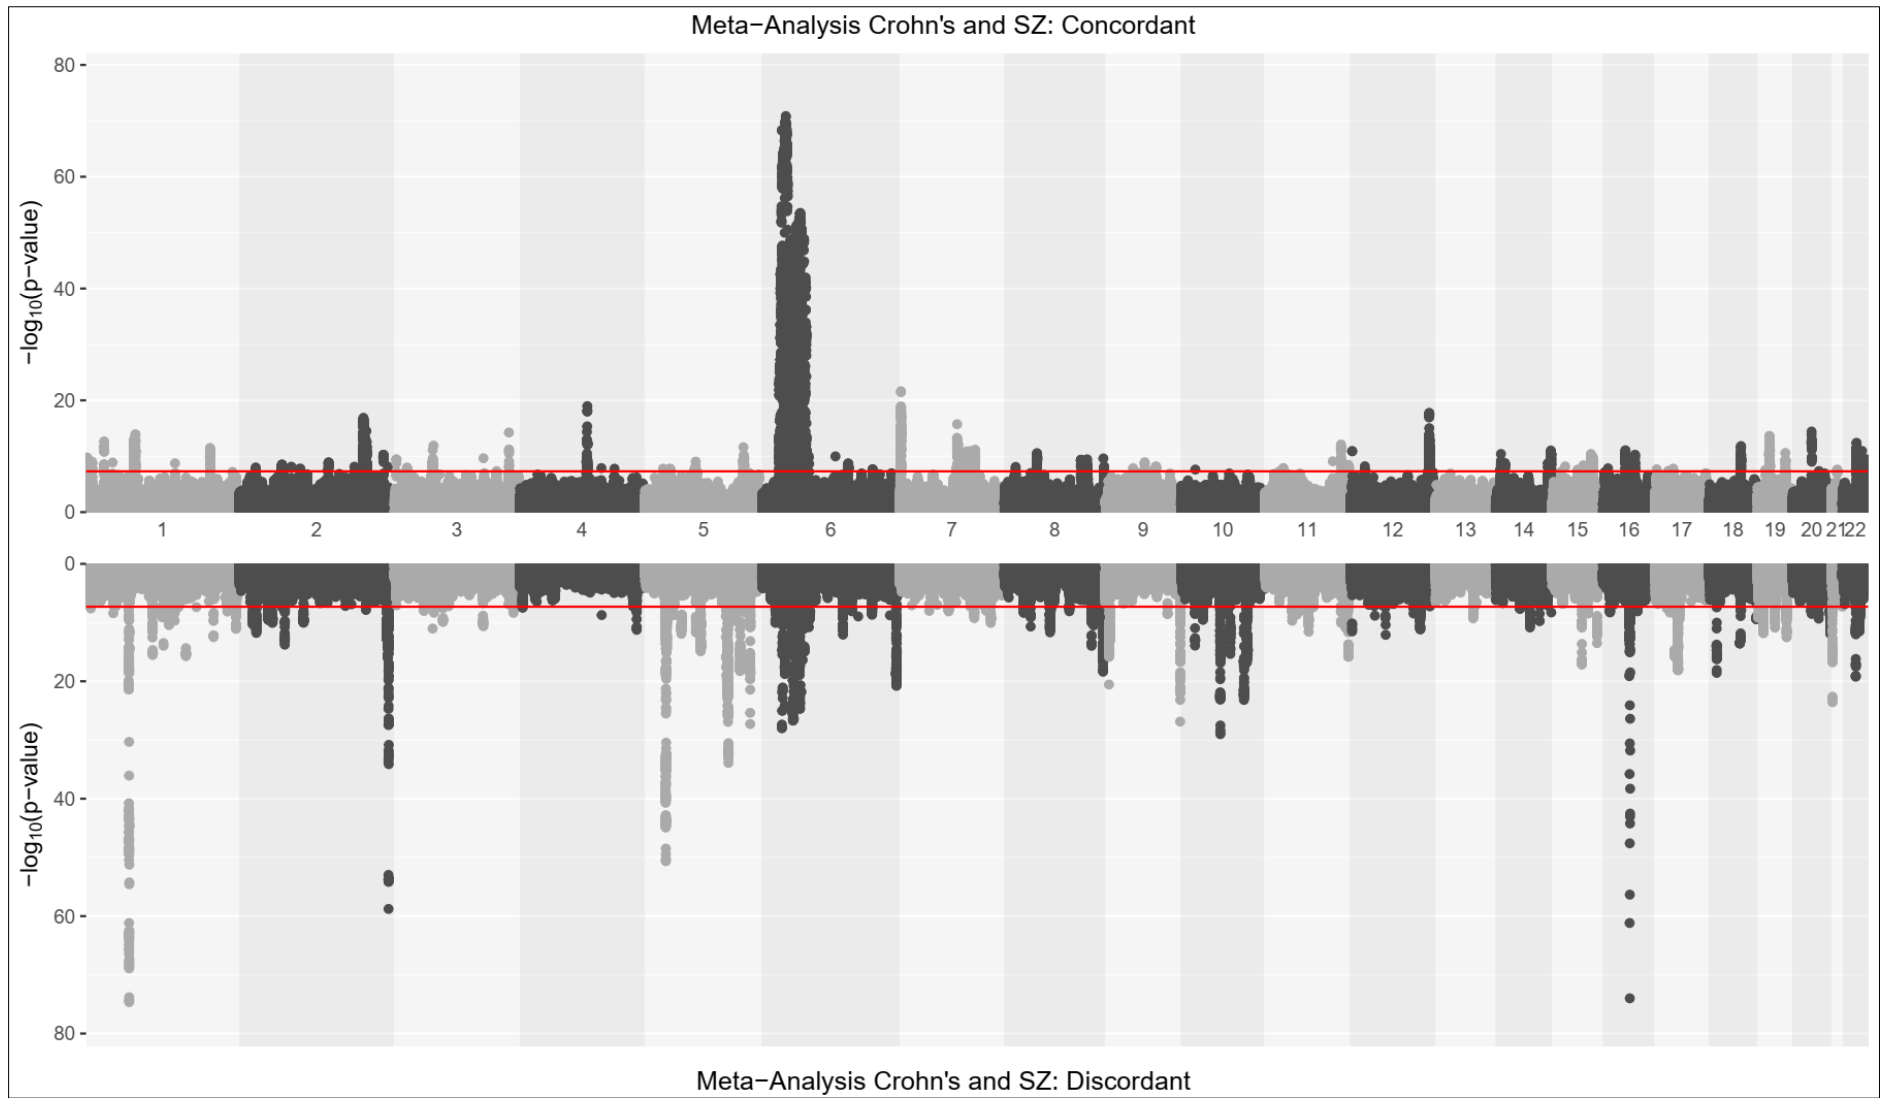

4F.

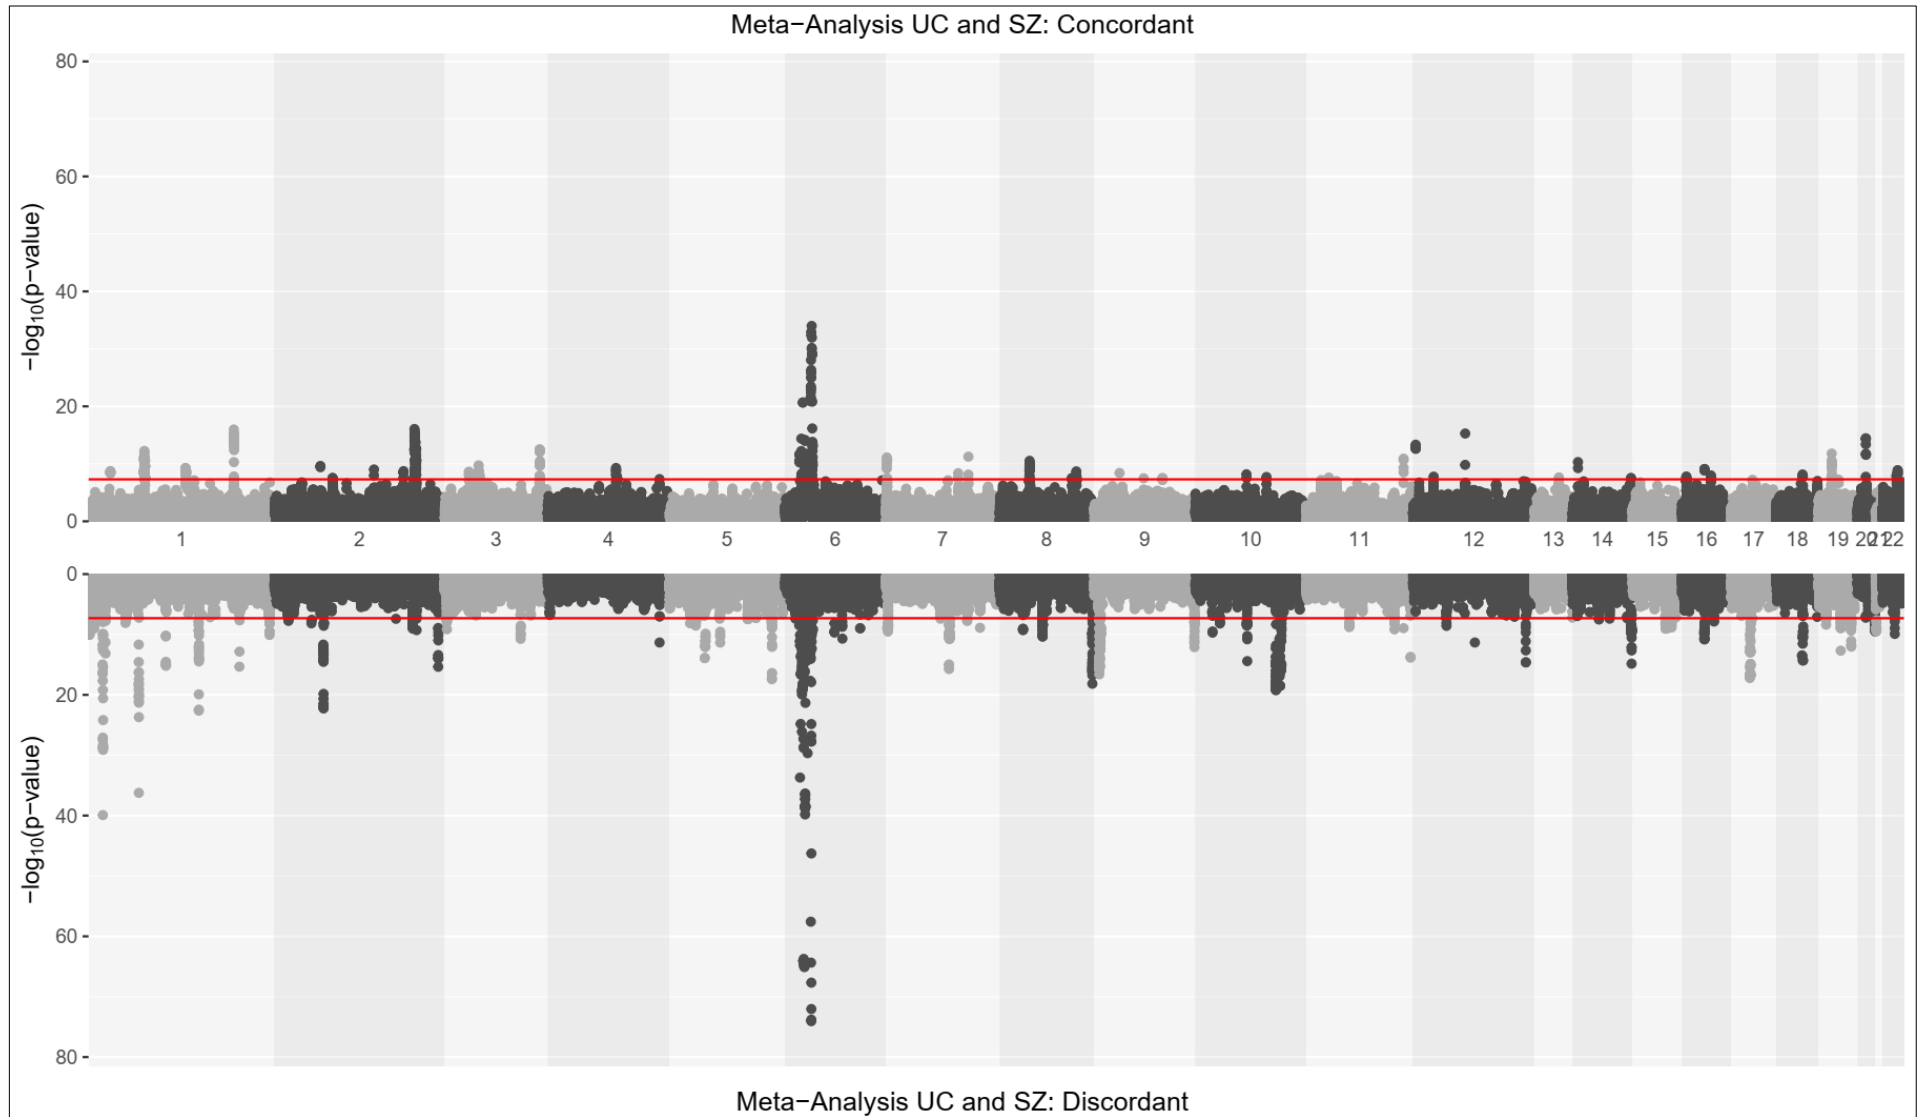

**S. Figures 4 Legend.** Miami plots depicting the results of ASSET two-sided meta-analysis of psychiatric-immune phenotype pairs (limited to case-control data only), such that the top of the plot reflects SNPs with significantly concordant effect for both phenotypes, and the bottom plot reflects SNPs with significantly discordant effect for both phenotypes. Y-axes reflect the magnitude of the  $-\log_{10}(p\text{-value})$  and all plots have the same y-axis limits to facilitate comparison. The red line depicts the threshold for genome-wide significance ( $5 \times 10^{-8}$ ). Details for each of the LD-independent genome-wide loci are provided in S. Table 6.

**eFigure 5. A & B.** Tissue and Cell Type Enrichment Analyses of Loci With Concordant and Discordant Effects Within the Psychiatric-Immune Associations Identified

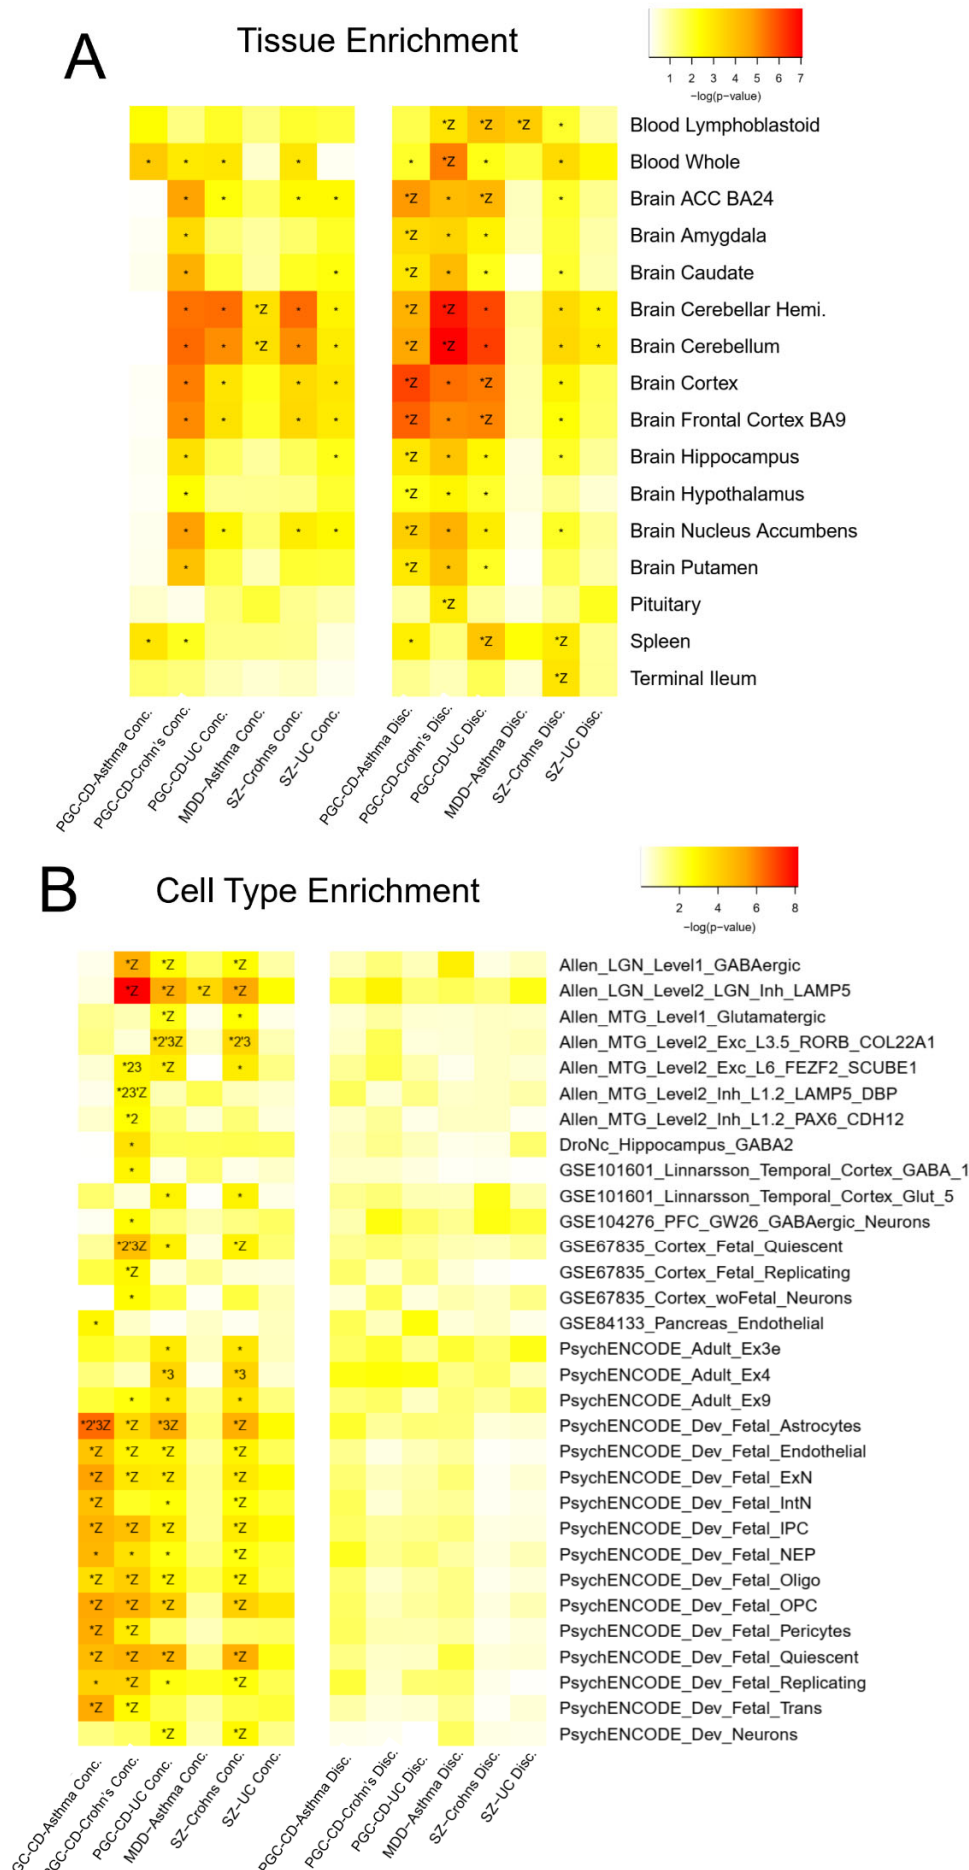



**Figure 5 Legend.** Tissue and cell type enrichment results performed on concordant (Conc.) and discordant (Disc.) SNP subsets generated with respect to psychiatric-immune phenotype pairs. Color intensity reflects  $-\log_{10}(p)$  of the enrichment  $p$ -value.  $P$ -values were corrected by applying the false discover rate (FDR) multiple testing correction per database and significant findings (FDR  $q < 0.05$ ) are denoted with \*. Differences in enrichment effects between respective concordant and discordant effects based on two-tailed  $Z$ -test are indicated using “ $Z$ ” to denote the more significant enrichment. We display all terms with significant enrichment among at least 1 concordant SNP subsets, will full results in S. Table 7. **Panel A** depicts tissue-level enrichment analyses conducted using eQTL data from the GTExv8 database. **Panel B** depicts cell type enrichment analyses using all human datasets provided within the FUMA interface. Numerical symbols within the heatmap denote the results of conditioned significance analyses; cell types for which Step 2 (*i.e.*, within reference data set conditioning) average proportional significance [PS]  $\geq 0.8$  are denoted with 2, whereas 2' denotes the cell type with the highest average Step 2 PS when none reached the threshold of 0.8. Similarly, 3 and 3' indicate annotations with an average PS  $\geq 0.8$  and the highest average PS when none reached this threshold. Full names of gene-sets can be searched within the Molecular Signature Database for detailed descriptions. Abbreviations include: ACC (anterior cingulate cortex), Brodmann's area (BA), the PGC cross-disorder phenotype (PGC-CD), developmental (Dev.), excitatory (Ex), gestational week (GW), hemisphere (Hemi), inhibitory (Inh), lateral geniculate nucleus (LGN), major depressive disorder (MDD), middle temporal gyrus (MTG), neuroepithelial cells (NEP), oligodendrocyte precursor cells (OPC), prefrontal cortex (PFC), schizophrenia (SZ), and ulcerative colitis (UC).
